# Supplementary material
Source: publisher figshare collection journal article supplement (https://gsapubs.figshare.com/articles/dataset/_/25594200)
Supplement: Supplementary file 1 [file 1]

## Sheet: Introduction
	Excessive Subsidence of Oceanic Basins Caused by Recycled Oceanic Crust in the Mantle Source: A New Perspective on the Oceanic Topography Within Southeast Asia Fan Yang, Xiao-long Huang*, Yi-gang Xu*, Le Zhang, Peng-li He, Yang Yu, Liang Liu In this file we show the method of quantification analysis for basaltic glasses and melt inclusions by EPMA, the major and trace element composition standard…

## Sheet: Table S1
Table S1. Method of quantification analysis for basaltic glasses and melt inclusions by EPMA
Elements	Crystal	Line	Counting time (s)			Standards	Oxides	Recommended value	Measured	S.D.	D.L.
										(n = 36)
			Peak	BG (-)	BG (+)			(wt%)	(wt%)	(wt%)	(ppm)
Si	TAP	Kα	20	-	5	olivine	SiO2	49.3 ± 0.1	49.61	0.12	214
Ti	LPET	Kα	60	-	30	rutile	TiO2	2.79 ± 0.02	2.73	0.04	302
Al	TAP	Kα	30	-	15	pyrope	Al2O3	13.6 ± 0.1	13.16	0.06	165
Cr	LPET	Kα	60	30	30	chromite	Cr2O3	-	0.05	0.02	390
Fe	LLIF	Kα	60	-	30	olivine	FeOt	11.3 ± 0.1	11.39	0.09	619
Mn	LLIF	Kα	60	-	30	rhodonite	MnO	0.17 ± 0.03	0.17	0.01	370
Mg	LTAP	Kα	30	15	15	pyrope	MgO	7.13 ± 0.02	7.19	0.04	151
Ca	PET	Kα	30	-	15	diopside	CaO	11.4 ± 0.1	10.99	0.08	391
Na	LTAP	Kα	8	-	4	jadeite	Na2O	2.4 ± 0.1	2.3	0.04	394
K	LPET	Kα	8	-	4	orthoclase	K2O	0.51 ± 0.02	0.51	0.02	319
P	LPET	Kα	60	30	30	monazite	P2O5	0.29 ± 0.02	0.27	0.02	174

## Sheet: Table S2
Table S2. The major and minor composition (wt%) of BHVO-2G for repeated anylasis using Cameca FiveFE EMPA
Analysis No.	Na2O	SiO2	MgO	Al2O3	K2O	P2O5	CaO	TiO2	Cr2O3	FeO	MnO	Total
BHVO-2-1	2.2499	49.7499	7.2419	13.2605	0.5282	0.2838	11.0674	2.6888	0.0452	11.426	0.176	98.7176
BHVO-2-2	2.3037	49.8245	7.3168	13.2972	0.5131	0.2847	10.9861	2.7311	0.0182	11.467	0.1713	98.9138
BHVO-2-3	2.2989	49.6433	7.2055	13.2336	0.5377	0.264	11.1014	2.709	0.0643	11.3449	0.1775	98.5801
BHVO-2-4	2.3217	49.7214	7.2128	13.2487	0.5252	0.2894	11.0193	2.7639	0.0462	11.3434	0.1694	98.6612
BHVO-2-5	2.3175	49.5111	7.1677	13.2383	0.4849	0.2759	10.9784	2.6941	0.0128	11.3341	0.1672	98.1819
BHVO-2-6	2.4283	49.5108	7.2438	13.1819	0.5169	0.2773	10.8918	2.6512	0.0287	11.4806	0.1762	98.3876
BHVO-2-7	2.2661	49.5448	7.2563	13.2045	0.5114	0.3074	11.0349	2.7269	0.0297	11.3929	0.1468	98.4216
BHVO-2-8	2.3415	49.6948	7.2214	13.1402	0.5003	0.2711	10.7922	2.6844	0.043	11.3639	0.1455	98.1982
BHVO-2-9	2.2035	49.582	7.164	13.2196	0.5501	0.2638	11.0186	2.7173	0.0306	11.3859	0.157	98.2924
BHVO-2-10	2.3465	49.4857	7.2112	13.176	0.5192	0.268	10.8958	2.7011	0.0097	11.4501	0.1597	98.223
BHVO-2-11	2.3241	49.7094	7.2701	13.1948	0.5015	0.2804	11.0684	2.6556	0.0505	11.339	0.1837	98.5774
BHVO-2-12	2.2905	49.6777	7.1874	13.1948	0.5231	0.2565	10.9507	2.7284	0.0622	11.4855	0.159	98.5159
BHVO-2-13	2.257	49.7751	7.2131	13.2303	0.5382	0.2582	11.0396	2.7378	0.0522	11.314	0.1668	98.5823
BHVO-2-14	2.2817	49.6704	7.207	13.1837	0.5141	0.2932	11.1331	2.7436	0.0159	11.3725	0.157	98.5721
BHVO-2-15	2.3319	49.334	7.159	13.1152	0.5177	0.2383	11.0978	2.7577	0.0363	11.2686	0.1705	98.0269
BHVO-2-16	2.2861	49.7184	7.1709	13.093	0.5201	0.2709	10.8635	2.7627	0.0452	11.5495	0.1604	98.4406
BHVO-2-17	2.3247	49.4834	7.1715	13.1637	0.5111	0.2916	10.9872	2.768	0.0535	11.27	0.1669	98.1917
BHVO-2-18	2.2989	49.5881	7.1913	13.1537	0.4906	0.2327	10.9877	2.6733	0.0524	11.4773	0.1788	98.3248
BHVO-2-19	2.3106	49.7362	7.1808	13.1659	0.5154	0.2818	11.0973	2.7613	0.0516	11.3198	0.1781	98.5988
BHVO-2-20	2.3306	49.4256	7.2244	13.0903	0.5087	0.2669	10.9555	2.6757	0.0385	11.4665	0.1774	98.16
BHVO-2-21	2.3269	49.6557	7.2206	13.2164	0.5256	0.2524	11.0488	2.7827	0.0535	11.4192	0.1952	98.6968
BHVO-2-22	2.3099	49.6433	7.2301	13.0468	0.5387	0.2747	10.9623	2.6996	0.0434	11.5261	0.1941	98.469
BHVO-2-23	2.3398	49.5211	7.1871	13.0394	0.5371	0.2689	11.0113	2.7717	0.0414	11.177	0.1562	98.051
BHVO-2-24	2.3305	49.6682	7.0971	13.0996	0.5064	0.2919	10.9833	2.7394	0.0427	11.3129	0.1619	98.2341
BHVO-2-25	2.3103	49.5327	7.2378	13.1915	0.4948	0.2702	11.0208	2.723	0.0434	11.3574	0.145	98.3269
BHVO-2-26	2.2538	49.8867	7.2079	13.2287	0.4852	0.3042	10.9712	2.6863	0.0521	11.2515	0.1849	98.5122
BHVO-2-27	2.2731	49.717	7.2464	13.1716	0.491	0.2986	10.8681	2.6901	0.0667	11.3959	0.1721	98.3905
BHVO-2-28	2.2874	49.6685	7.2019	13.1657	0.5344	0.2882	11.1151	2.7412	0.0278	11.328	0.1981	98.5564
BHVO-2-29	2.3254	49.6087	7.1857	13.1336	0.4942	0.2373	10.9746	2.66	0.0563	11.4788	0.164	98.3186
BHVO-2-30	2.3449	49.664	7.2326	13.2301	0.5063	0.2683	11.0058	2.7729	0.0188	11.4046	0.1557	98.6039
BHVO-2-31	2.2909	49.5795	7.2471	13.2454	0.5205	0.2669	10.9175	2.7084	0.0952	11.2284	0.1653	98.2649
BHVO-2-32	2.2804	49.5994	7.1958	13.1314	0.5094	0.3069	10.9592	2.7501	0.0655	11.4731	0.1623	98.4334
BHVO-2-33	2.3693	49.6005	7.2056	13.1851	0.5341	0.2815	10.9551	2.7464	0.0162	11.3867	0.1826	98.4631
BHVO-2-34	2.3357	49.3891	7.1082	13.1895	0.4785	0.28	10.983	2.7413	0.0479	11.3916	0.176	98.1209
BHVO-2-35	2.2264	49.4387	7.1575	13.1732	0.5	0.2625	10.8501	2.7241	0.0562	11.6211	0.1638	98.1737
BHVO-2-36	2.2927	49.6395	7.174	13.2069	0.5076	0.2694	10.9827	2.6847	0.0551	11.3662	0.1759	98.3549

## Sheet: Table S3
Table S3. The major and minor composition (wt%) of the glass hosting euhedral olivine containing melt inclusions
Analysis No.	Na2O	SiO2	MgO	Al2O3	K2O	P2O5	CaO	TiO2	Cr2O3	FeO	MnO	Total
G-01	2.9597	48.0973	8.7391	16.528	0.0493	0.0698	10.4363	1.1011	0.0468	11.4299	0.1963	99.6677
G-02	2.8638	47.7485	8.665	16.4691	0.0503	0.0697	10.4572	1.1181	0.044	11.4283	0.1843	99.1485
G-03	2.886	48.2585	8.7319	16.4415	0.0595	0.0804	10.3188	1.0869	0.0107	11.4552	0.1958	99.556
G-04	2.9103	48.1205	8.6899	16.4447	0.0496	0.0691	10.3978	1.0386	0.0423	11.5807	0.1634	99.5121
G-05	2.9181	47.9898	8.6741	16.5848	0.0368	0.0706	10.3281	1.1175	0.0483	11.4664	0.1963	99.4308
G-06	2.952	47.8902	8.8408	16.4642	0.0493	0.0678	10.3562	1.1311	0.0524	11.5517	0.1966	99.5602
G-07	2.9325	48.095	8.9308	16.4516	0.0532	0.0756	10.3327	1.0756	0.0676	11.4964	0.172	99.6843
G-08	2.9026	47.9722	8.7951	16.3681	0.0506	0.0777	10.284	1.07	0.0427	11.6188	0.1681	99.35
G-09	2.9864	47.9454	8.8741	16.433	0.0508	0.082	10.3824	1.0547	0.0514	11.3763	0.1793	99.4355
G-10	2.9417	48.0532	8.785	16.5063	0.0597	0.0877	10.2856	1.0754	0.0435	11.2657	0.1886	99.294
G-11	2.8643	48.1824	8.7913	16.4455	0.0412	0.058	10.4364	1.0676	0.0531	11.5111	0.1987	99.6497
G-12	2.7936	47.8789	8.7556	16.381	0.0671	0.0555	10.2516	1.0857	0.061	11.5533	0.1688	99.0593
G-13	2.9737	48.3272	8.8284	16.4939	0.0567	0.0774	10.4341	1.0994	0.0416	11.539	0.1643	100.036
G-14	2.9019	47.8651	8.7547	16.2923	0.0343	0.0811	10.1459	1.0712	0.0621	11.3436	0.1975	98.7662
G-15	3.0018	47.9071	8.7326	16.3562	0.0453	0.069	10.1876	1.1023	0.0371	11.4654	0.1648	99.1062
G-16	2.9833	47.8629	8.7133	16.3592	0.0598	0.079	10.1674	1.0933	0.0628	11.2307	0.1844	98.8402
G-17	2.9424	47.9322	8.8071	16.5177	0.0514	0.0796	10.2274	1.0678	0.0319	11.653	0.1714	99.5129
G-18	2.9689	47.9881	8.7014	16.4748	0.0628	0.0626	10.2601	1.1211	0.0572	11.5359	0.1894	99.4499
G-19	2.9664	47.8439	8.8167	16.4254	0.0568	0.0817	10.3144	1.0348	0.0413	11.6301	0.1853	99.3969
G-20	2.8964	47.8501	8.7063	16.347	0.0658	0.0853	10.2293	1.0505	0.0611	11.3515	0.1629	98.8237
G-21	2.9096	47.7477	8.7849	16.3363	0.0496	0.086	10.2753	1.0635	0.0617	11.5826	0.1615	99.0749
G-22	2.8657	47.9433	8.7854	16.2757	0.0591	0.0754	10.3656	1.0552	0.067	11.4777	0.201	99.1711
G-23	2.9302	48.098	8.7364	16.379	0.0269	0.0782	10.2505	1.0353	0.0385	11.3435	0.1925	99.1337
G-24	2.9928	47.9039	8.7931	16.3709	0.0604	0.074	10.3445	1.0799	0.0535	11.3697	0.21	99.2526
G-25	2.9087	47.9391	8.7769	16.4355	0.0463	0.0626	10.104	1.0843	0.0399	11.4241	0.1924	99.0464
G-26	2.9943	47.8826	8.7887	16.3896	0.0774	0.0689	10.4041	1.1178	0.0531	11.3632	0.1735	99.3435
G-27	2.9571	47.9298	8.7993	16.3354	0.0496	0.0859	10.4189	1.0767	0.0662	11.4359	0.2215	99.4058
G-28	2.9883	48.1265	8.7794	16.4309	0.0242	0.0669	10.2518	1.042	0.0601	11.2643	0.1751	99.2432
G-29	2.8187	47.9777	8.7543	16.3677	0.0545	0.0697	10.2091	1.0804	0.0722	11.2583	0.1812	98.8504
G-30	2.9987	47.9395	8.8095	16.3439	0.0724	0.0903	10.1934	1.0635	0.0444	11.4102	0.1892	99.1711
G-31	2.9035	47.9763	8.8492	16.425	0.0681	0.0917	10.2893	1.09	0.0212	11.5354	0.1788	99.4537
G-32	2.912	48.149	8.742	16.4136	0.066	0.0654	10.3906	1.1083	0.0604	11.4741	0.185	99.5664
G-33	2.9	48.0215	8.817	16.3856	0.061	0.069	10.2882	1.1181	0.0594	11.3456	0.1871	99.2571
G-34	3.0118	48.1075	8.8068	16.5191	0.0493	0.0719	10.2667	1.101	0.0604	11.4601	0.1881	99.6561
G-35	2.9065	48.0279	8.7979	16.4277	0.0502	0.0974	10.3093	1.083	0.0819	11.3813	0.1873	99.3687
G-36	2.99	48.1677	8.7414	16.467	0.0512	0.0747	10.3589	1.1078	0.0288	11.4444	0.191	99.6642
G-37	2.9996	48.2751	8.7969	16.4062	0.0329	0.0838	10.3983	1.0725	0.0715	11.3961	0.199	99.7449
G-38	2.9963	47.9859	8.8266	16.3871	0.0403	0.0761	10.2171	1.028	0.0253	11.3791	0.1795	99.1818
G-39	2.8792	47.88	8.7581	16.4109	0.0565	0.0561	10.261	1.0332	0.0447	11.4848	0.1842	99.0593
G-40	3.0322	48.0482	8.8082	16.3838	0.0553	0.0853	10.2062	1.115	0.0597	11.4174	0.1758	99.4124
G-41	3.0031	48.1028	8.7464	16.401	0.0467	0.0882	10.1953	1.0994	0.0246	11.3246	0.1884	99.2588
G-42	2.8701	47.7652	8.7794	16.3842	0.0664	0.0512	10.258	1.0845	0.05	11.48	0.1931	98.9822
G-43	3.0002	47.8224	8.7472	16.3957	0.0606	0.0854	10.2519	1.0398	0.026	11.3797	0.1705	98.9886
G-44	2.9746	47.7914	8.9041	16.4276	0.0456	0.0612	10.2172	1.0752	0.0417	11.5778	0.2084	99.3458
G-45	2.9745	47.7305	8.7339	16.2181	0.0448	0.0562	10.2051	1.027	0.0674	11.4648	0.1541	98.6995
G-46	2.9293	47.6137	8.7979	16.3187	0.0541	0.0939	10.1553	1.0519	0.0434	11.2572	0.2062	98.5765
G-47	2.9093	47.7061	8.6977	16.2933	0.0518	0.0861	10.3045	1.1159	0.084	11.4799	0.1757	98.9272
G-48	2.9295	47.8164	8.7402	16.265	0.0529	0.0683	10.24	1.1175	0.0344	11.36	0.1535	98.7949
G-49	2.9109	47.7242	8.748	16.2882	0.0824	0.0782	10.2286	1.0832	0.0246	11.4276	0.2023	98.8308
G-50	3.0807	47.6887	8.7621	16.2569	0.0597	0.0854	10.2416	1.0385	0.0552	11.5274	0.1549	99.0007
G-51	2.975	47.6926	8.7163	16.3159	0.0468	0.0754	10.207	1.0554	0.0437	11.4476	0.1678	98.7906
G-52	2.9146	47.8679	8.7715	16.2707	0.0709	0.0691	10.0889	1.0818	0.0208	11.3714	0.1892	98.7343
G-53	2.9419	47.6952	8.6475	16.2847	0.0628	0.1096	10.3963	1.0673	0.0375	11.4046	0.1973	98.8715
G-54	2.9681	47.7111	8.8528	16.3709	0.0709	0.0797	10.1771	1.0861	0.074	11.4949	0.1796	99.1039
G-55	2.9425	47.8398	8.8697	16.375	0.0536	0.0697	10.3842	1.0718	0.0427	11.4245	0.155	99.2486
G-56	2.8859	47.6628	8.7396	16.2353	0.0782	0.0662	10.1445	1.1042	0.0219	11.3489	0.1746	98.4621
G-57	2.9953	47.7257	8.7984	16.2814	0.0582	0.074	10.2171	1.0427	0.0441	11.4584	0.1679	98.8797
G-58	2.9124	47.7782	8.8625	16.2951	0.0693	0.0612	10.0821	1.0508	0.0733	11.4724	0.181	98.8587
G-59	3.0238	47.7263	8.8899	16.3092	0.0631	0.0583	10.0589	1.0775	0.0434	11.5176	0.1589	98.9269
G-60	2.8999	47.7847	8.8402	16.3136	0.0581	0.0576	10.3641	1.0682	0.0778	11.4738	0.1509	99.1118
G-61	2.904	47.6366	8.7654	16.3867	0.0542	0.0804	10.1524	1.0917	0.0368	11.4039	0.1834	98.731
G-62	2.9526	47.7859	8.8305	16.238	0.0694	0.0648	10.2673	1.0317	0.0226	11.5496	0.1824	99.0219
G-63	2.9815	47.8052	8.8166	16.2524	0.095	0.0527	10.2179	1.0996	0.0271	11.4932	0.1722	99.0489
G-64	2.8496	47.8376	8.7771	16.2717	0.061	0.0869	10.3026	1.0718	0.066	11.3954	0.1591	98.8889
G-65	2.9124	47.9309	8.778	16.2972	0.0655	0.0733	10.1439	1.0931	0.0483	11.5177	0.2022	99.0699
G-66	2.8851	47.6484	8.7892	16.3473	0.0586	0.0819	10.077	1.044	0.0573	11.4619	0.1768	98.6816
G-67	2.9274	47.8424	8.7955	16.2938	0.0609	0.0605	10.2226	1.0593	0.0549	11.6002	0.2121	99.1296
G-68	2.967	47.7808	8.8028	16.3462	0.0546	0.0627	10.1978	1.0745	0.0431	11.4453	0.1923	98.9766
G-69	2.9318	47.6871	8.741	16.294	0.0453	0.0776	10.1201	1.1137	0.0354	11.5771	0.209	98.8601
G-70	2.8741	47.7366	8.7924	16.3357	0.0456	0.0435	10.3767	1.0845	0.0542	11.4865	0.2113	99.0602
G-71	2.9527	47.8337	8.7774	16.2828	0.068	0.0656	10.1045	1.0953	0.0271	11.515	0.1634	98.8854
G-72	2.9252	47.7393	8.7668	16.2875	0.0516	0.0776	10.2151	1.048	0.0379	11.3506	0.1934	98.7012
G-73	2.8911	47.7417	8.7686	16.3503	0.0498	0.0877	10.136	1.0706	0.0779	11.464	0.1536	98.8058
G-74	3.0053	47.6378	8.7557	16.2778	0.0556	0.0834	9.9954	1.0865	0.024	11.3989	0.1682	98.5068
G-75	2.9079	47.6578	8.7104	16.3479	0.0387	0.062	10.3256	1.0331	0.0567	11.4774	0.1971	98.8464
G-76	2.9542	47.7449	8.7975	16.3422	0.0685	0.0891	10.0743	1.0705	0.064	11.423	0.1639	98.8138
G-77	2.945	47.8765	8.7777	16.4139	0.0683	0.0819	10.2686	1.0492	0.033	11.5355	0.209	99.28
G-78	2.9145	47.7535	8.7406	16.3429	0.0315	0.0827	10.0921	1.0362	0.0362	11.4962	0.1616	98.688
G-79	2.8923	47.7839	8.7839	16.3717	0.0402	0.0998	10.4039	1.0599	0.0456	11.4013	0.1803	99.0806
G-80	2.9638	48.028	8.8364	16.3727	0.0428	0.0884	10.2019	1.0584	0.0379	11.5699	0.1498	99.3829
G-81	2.9077	47.9158	8.7977	16.4154	0.0599	0.0805	10.1732	1.0308	0.0542	11.2733	0.1897	98.9447
G-82	2.8656	47.9537	8.8198	16.3801	0.0575	0.0798	10.2249	1.0364	0.0657	11.4047	0.1791	99.0674
G-83	2.9611	48.1068	8.7773	16.3271	0.0538	0.0749	10.3874	1.0771	0.0052	11.4068	0.1693	99.347
G-84	2.9545	47.9284	8.9173	16.4051	0.0546	0.0749	10.238	1.0682	0.0577	11.5305	0.2013	99.4839
G-85	2.885	48.2115	8.7984	16.5462	0.0481	0.0635	10.2919	1.0946	0.0195	11.4169	0.1413	99.5629
G-86	2.9223	47.9649	8.8337	16.4348	0.0666	0.0927	10.291	1.0786	0.0257	11.3806	0.1937	99.2906
G-87	3.0715	47.8758	8.7727	16.5379	0.0715	0.0635	10.1522	1.0399	0.0543	11.5526	0.1709	99.3758
G-88	2.9657	48.1725	8.83	16.3285	0.0656	0.0663	10.2507	1.1019	0.0271	11.5166	0.1771	99.5262
G-89	2.885	47.9567	8.7359	16.3446	0.0476	0.0821	10.2531	1.0818	0.0469	11.6301	0.1518	99.2156
G-90	2.8958	48.0506	8.8209	16.5194	0.055	0.0516	10.3405	1.0238	0.0334	11.4204	0.1725	99.3957
G-91	2.9615	48.0904	8.748	16.3817	0.0538	0.0678	10.3966	1.083	0.0624	11.3894	0.2017	99.4365
G-92	2.9623	48.0827	8.671	16.4256	0.0609	0.0791	10.2267	1.1123	0.0565	11.5284	0.1731	99.3831
G-93	2.9161	48.3212	8.7661	16.4417	0.0622	0.0686	10.3775	1.0722	0.0432	11.4469	0.1802	99.7219
G-94	2.9545	48.0548	8.8828	16.5396	0.0583	0.0544	10.3125	1.0472	0.0517	11.3709	0.165	99.4917
G-95	2.9571	47.8868	8.799	16.4629	0.0601	0.0714	10.1968	1.054	0.0855	11.4262	0.1599	99.1596
G-96	2.9491	48.1114	8.8446	16.395	0.0348	0.0636	10.3844	1.0593	0.0207	11.4279	0.1702	99.4609
G-97	2.9002	48.0437	8.8056	16.4385	0.0398	0.0735	10.2665	1.089	0.03	11.4382	0.1721	99.2989
G-98	3.0451	48.2413	8.8768	16.4473	0.0496	0.0927	10.3382	1.0426	0.0269	11.4895	0.1661	99.8231
G-99	3.0528	48.1917	8.7605	16.5209	0.0683	0.0593	10.4241	1.1134	0.0599	11.5896	0.1819	100.043
G-100	2.9517	48.2354	8.6814	16.4841	0.0586	0.065	10.3357	1.0703	0.0476	11.4977	0.18	99.6399
G-101	2.8949	48.0489	8.7438	16.4454	0.0629	0.0805	10.4007	1.0832	0.0534	11.3412	0.1948	99.3628
G-102	2.9438	47.7881	8.6867	16.3237	0.0703	0.0789	10.2127	1.061	0.0186	11.3642	0.1787	98.7266
G-103	2.9094	48.0006	8.7131	16.3153	0.0491	0.0824	10.4561	1.0451	0.0653	11.4487	0.1905	99.2757
G-104	2.9516	47.6909	8.6985	16.3651	0.0611	0.0972	10.3298	1.0748	0.0625	11.4721	0.1951	98.9986
G-105	2.8842	47.9343	8.8202	16.3261	0.07	0.074	10.3633	1.0585	0.0196	11.4472	0.1835	99.181
G-106	2.807	47.8643	8.6831	16.2978	0.0589	0.0698	10.4481	1.0506	0.0475	11.5689	0.1784	99.0743
G-107	2.9116	47.9759	8.7443	16.4054	0.0515	0.0599	10.2292	1.0881	0.0602	11.538	0.2025	99.2666
G-108	2.8946	47.9599	8.795	16.3982	0.0644	0.0845	10.3047	1.0793	0.0543	11.6984	0.186	99.5194
G-109	2.9435	47.9355	8.8101	16.3426	0.0558	0.081	10.4526	1.0868	0.0519	11.5022	0.1646	99.4267
G-110	2.8546	48.072	8.8159	16.5244	0.0613	0.0691	10.2845	1.0872	0.0513	11.4835	0.1785	99.4824
G-111	2.9579	48.0434	8.8219	16.4819	0.061	0.0747	10.3443	1.0856	0.0612	11.4234	0.1542	99.5094
G-112	2.8829	48.1491	8.7681	16.3991	0.0613	0.0824	10.3191	1.041	0.0306	11.5661	0.168	99.4677
G-113	2.9831	48.1046	8.8183	16.5315	0.0749	0.0656	10.3137	1.0958	0.0727	11.4606	0.1678	99.6886
G-114	3.0144	48.0565	8.7597	16.5113	0.0534	0.0832	10.3689	1.0569	0.0554	11.3683	0.1845	99.5125
G-115	2.9581	48.0409	8.7477	16.2508	0.0555	0.0951	10.3084	1.1048	0.0904	11.4502	0.1663	99.268
G-116	2.9257	48.1182	8.8752	16.3975	0.0634	0.0818	10.2892	1.0827	0.0296	11.332	0.189	99.3843
G-117	2.9053	48.1101	8.8087	16.4271	0.0324	0.0741	10.3357	1.1065	0.0441	11.4566	0.2172	99.5178
G-118	2.9706	48.0443	8.8898	16.4005	0.0454	0.0733	10.3485	1.101	0.0344	11.4124	0.151	99.4713
G-119	2.9589	47.9933	8.8076	16.4043	0.0519	0.0705	10.3228	1.0276	0.0585	11.4527	0.1806	99.3287
G-120	2.9445	48.0706	8.7284	16.38	0.0765	0.0726	10.3169	1.1139	0.063	11.3912	0.1764	99.3339
G-121	2.9574	48.0418	8.7555	16.4553	0.0413	0.079	10.2018	1.0723	0.0554	11.3453	0.1728	99.1778
G-122	2.9948	47.9581	8.674	16.3684	0.0283	0.0699	10.2378	1.0779	0.0213	11.4906	0.173	99.0942
G-123	2.9791	47.8136	8.602	16.2631	0.0411	0.0684	10.2587	1.0411	0.031	11.394	0.1706	98.6626
G-124	2.8863	47.9112	8.6287	16.4458	0.0496	0.0614	10.367	1.0257	0.0527	11.4261	0.1792	99.0337
G-125	2.9749	47.9661	8.6295	16.4983	0.0639	0.093	10.3351	1.087	0.0702	11.5028	0.1845	99.4054
G-126	2.8802	47.9569	8.7048	16.4605	0.0651	0.0895	10.3983	1.0847	0.0296	11.3612	0.1653	99.1962
G-127	2.9142	47.6805	8.6252	16.2765	0.066	0.0693	10.326	1.0612	0.0421	11.3643	0.1568	98.5822
G-128	2.9285	47.9225	8.7137	16.4617	0.0306	0.0689	10.3022	1.0886	0.0665	11.5229	0.1805	99.2864
G-129	2.9764	47.9822	8.6973	16.4551	0.0661	0.0951	10.3426	1.0489	0.0166	11.5655	0.1864	99.4322
G-130	2.9083	47.9215	8.7202	16.4555	0.0529	0.081	10.2925	1.0878	0.0596	11.4833	0.1738	99.2363
G-131	2.8579	47.8262	8.748	16.4277	0.0524	0.0589	10.4081	1.0776	0.0516	11.5255	0.1721	99.206
G-132	2.977	48.0031	8.7324	16.416	0.0387	0.0504	10.3903	1.1299	0.0187	11.2752	0.1945	99.2263
G-133	2.8668	47.8342	8.7476	16.3204	0.0511	0.0697	10.2809	1.1023	0.018	11.4639	0.1574	98.9124
G-134	2.9696	47.8556	8.7029	16.4433	0.0528	0.0973	10.3105	1.0791	0.06	11.6648	0.1448	99.3807
G-135	2.8426	47.8282	8.7472	16.418	0.0394	0.0732	10.3513	1.1044	0.06	11.4004	0.1754	99.0402
G-136	2.9086	47.7601	8.7405	16.2963	0.055	0.071	10.2935	1.0482	0.0502	11.4089	0.191	98.8233
G-137	2.95	47.7902	8.7712	16.3703	0.0643	0.0717	10.2335	1.0066	0.0468	11.3861	0.1573	98.8481
G-138	2.8719	47.7454	8.7153	16.2685	0.0523	0.0845	10.3095	1.0706	0.0482	11.2878	0.1849	98.6389
G-139	2.8099	47.7823	8.7305	16.346	0.0475	0.0852	10.2466	1.0921	0.0381	11.4865	0.1551	98.8198
G-140	2.9644	48.0756	8.7068	16.3111	0.0719	0.039	10.3393	1.0782	0.0616	11.2505	0.1836	99.0821
G-141	2.9499	48.0282	8.7676	16.3972	0.0588	0.0752	10.3878	1.0878	0.0537	11.4031	0.1912	99.4004
G-142	2.8961	48.1305	8.7559	16.4321	0.0623	0.0731	10.3101	1.0555	0.0294	11.4946	0.1862	99.426
G-143	2.9046	48.1307	8.7331	16.3692	0.065	0.0497	10.265	1.0477	0.0191	11.3087	0.1832	99.0758
G-144	2.8417	47.8948	8.678	16.4021	0.0693	0.0738	10.3352	1.0573	0.0547	11.5071	0.1891	99.103
G-145	2.7726	48.0249	8.6205	16.5151	0.0833	0.0809	10.4216	1.0865	0.0395	11.4669	0.1781	99.2899
G-146	2.8792	48.0464	8.6764	16.4492	0.0602	0.0837	10.3815	1.0559	0.0405	11.4916	0.182	99.3466
G-147	2.8885	48.1293	8.6632	16.5105	0.0422	0.0809	10.4754	1.0505	0.07	11.642	0.1675	99.7202
G-148	2.8321	48.0674	8.7677	16.4463	0.0497	0.0603	10.4005	1.0922	0.0596	11.4207	0.1903	99.3871
G-149	2.9164	48.0832	8.6811	16.4558	0.0567	0.0397	10.4684	1.042	0.0419	11.4377	0.188	99.4108
G-150	2.8756	47.9588	8.6042	16.4667	0.0551	0.0788	10.3809	1.0507	0.0083	11.5711	0.1443	99.1945
G-151	2.9707	47.8794	8.694	16.3674	0.0765	0.0774	10.3191	1.0842	0.0641	11.3931	0.1869	99.1128
G-152	2.9606	47.8187	8.7328	16.4238	0.056	0.0497	10.2889	1.1305	0.0451	11.3546	0.1593	99.02
G-153	2.911	47.7911	8.6889	16.2639	0.0341	0.0582	10.3313	1.0733	0.0423	11.3306	0.1803	98.7049
G-154	2.9467	47.8295	8.7789	16.3573	0.0455	0.0575	10.231	1.095	0.0191	11.5678	0.1836	99.1119
G-155	2.8105	47.8501	8.7041	16.4121	0.0676	0.0739	10.3747	1.1023	0.0818	11.436	0.1571	99.0702
G-156	2.8834	47.8784	8.7381	16.3288	0.0623	0.076	10.2292	1.1106	0.0374	11.5649	0.1684	99.0775
G-157	2.9783	47.8018	8.7395	16.4035	0.0454	0.0603	10.3319	1.0571	0.0786	11.4641	0.171	99.1315
G-158	2.917	48.0417	8.6877	16.3928	0.0419	0.0846	10.2895	1.0813	0.0645	11.3414	0.169	99.1114
G-159	2.9104	47.8099	8.6964	16.319	0.0602	0.0759	10.3464	1.0851	0.0391	11.5322	0.2011	99.0758
G-160	2.8974	47.9248	8.6971	16.3592	0.0726	0.0831	10.2056	1.0544	0.0135	11.2753	0.1859	98.7689
G-161	2.8834	47.9349	8.6872	16.3232	0.0428	0.0575	10.3564	1.0645	0.0412	11.4725	0.1772	99.0408
G-162	2.8498	47.9779	8.648	16.3881	0.0578	0.0817	10.3847	1.0718	0.069	11.2956	0.1804	99.005
G-163	2.9415	47.9585	8.7322	16.3317	0.0509	0.0795	10.3573	1.0985	0.0388	11.5059	0.2055	99.3004
G-164	2.9806	47.8496	8.6958	16.4923	0.0438	0.0937	10.5491	1.0596	0.0236	11.5509	0.2155	99.5545
G-165	2.8427	48.0061	8.7025	16.3922	0.0605	0.0753	10.4023	1.0834	0.0478	11.4448	0.1903	99.2479
G-166	2.8775	48.0512	8.7573	16.4897	0.0494	0.0895	10.2128	1.0746	0.097	11.3444	0.2026	99.246
G-167	2.785	47.8292	8.823	16.423	0.0788	0.0746	10.0831	1.0834	0.0211	11.3177	0.1491	98.6679
G-168	2.8005	48.0468	8.6277	16.4153	0.0378	0.0603	10.3196	1.0639	0.0471	11.3287	0.1728	98.9204
G-169	2.8893	48.1288	8.7658	16.4526	0.0719	0.0775	10.2384	1.1054	0.0593	11.4674	0.1882	99.4445
G-170	2.9997	48.1229	8.7031	16.4805	0.0671	0.0561	10.3504	1.1011	0.0575	11.4845	0.1864	99.6093
G-171	2.8092	48.1043	8.6987	16.4528	0.0343	0.0895	10.2536	1.0686	0.0354	11.4143	0.1831	99.1438
G-172	2.9173	48.1739	8.7737	16.4194	0.0554	0.0817	10.2867	1.107	0.0655	11.5486	0.176	99.6051
G-173	2.8459	47.9735	8.7577	16.4005	0.0533	0.0597	10.4585	1.1106	0.0465	11.2683	0.1724	99.1469
G-174	2.95	48.0726	8.8164	16.4453	0.0494	0.0541	10.5018	1.0526	0.031	11.5007	0.1746	99.6485
AVRAGE(174)	2.92652	47.9372	8.75975	16.3901	0.0556282	0.073919	10.2915	1.07497	0.0472707	11.4474	0.179611	99.1946
S.D.	0.0556566	0.155244	0.0628599	0.0757634	0.0118473	0.012308	0.0978961	0.0255077	0.0176732	0.0914518	0.0159645

## Sheet: Table S4
Table S4. The raw and corrected major and minor composition (wt%) of melt inclusions hosted by olivine
Sample name	Shape	Size (µm)	Na2O	SiO2	MgO	Al2O3	K2O	P2O5	CaO	TiO2	Cr2O3	FeOt	MnO	Total	Fo of host olivine	RFC CORRECTED	Sample	SiO2	TiO2	Al2O3	Fe2O3	FeO	MnO	MgO	CaO	Na2O	K2O	P2O5	Cr2O3
M-005	round	8	3.1231	49.213	5.1099	18.4799	0.0907	0.0754	11.1214	1.2182	0.0511	10.5676	0.1604	99.2106	85.0602		M-005	48.2185	1.0683	16.1825	1.2143	10.4376	0.1401	10.0765	9.7375	2.7321	0.0788	0.0701	0.0438
M-003	round	31	2.81057	48.194	8.0813	16.576	0.0591667	0.0816333	10.7245	1.09613	0.0650667	11.7309	0.1819	99.6012	85.2432		M-003	47.7205	1.0256	15.4593	1.297	10.8506	0.1678	10.6679	9.9954	2.6201	0.0559	0.0746	0.0653
M-006	oval	9	3.2623	49.0695	5.3737	17.9347	0.0649	0.0669	11.099	1.1446	0.0252	11.0022	0.1734	99.2163	85.0602		M-006	48.0969	0.9983	15.7011	1.2901	10.7437	0.1489	10.3061	9.7201	2.8547	0.0525	0.0613	0.0263
M-008	cave	130	3.0364	47.8184	8.6684	16.3807	0.0661	0.0733	10.3955	1.0836	0.0155	11.4493	0.1957	99.2389	85.0602		M-008	47.811	1.0437	15.8292	1.2777	10.5157	0.1933	10.1866	10.0503	2.9378	0.0676	0.0676	0.0193
M-009	cave	15	2.79	47.8809	7.877	16.4972	0.0547	0.0921	10.9734	1.1257	0.0381	11.9476	0.1817	99.4585	85.0602		M-009	47.4051	1.0437	15.2399	1.3383	11.0897	0.1663	10.8416	10.1322	2.5769	0.0462	0.0831	0.0369
M-010	oval	5	3.0051	48.4912	4.7609	17.7585	0.061	0.0801	12.0598	1.1594	0.0617	11.4145	0.2122	99.0644	85.0602		M-010	47.3327	0.982	15.0346	1.3826	11.3506	0.1778	10.8129	10.2093	2.5481	0.0508	0.0677	0.0508
M-011	cave	34	2.9317	48.2186	8.0794	16.5971	0.0849	0.0571	10.4633	1.071	0.0637	11.7809	0.172	99.5404	85.0602		M-011	47.7879	0.9986	15.4917	1.3105	10.8981	0.1586	10.6719	9.7616	2.7344	0.0747	0.056	0.056
M-013	cave	38	2.8222	47.9597	8.2849	16.5089	0.059	0.0761	10.8396	1.0876	0.0675	11.6536	0.1959	99.5703	85.1986		M-013	47.6096	1.0277	15.5662	1.2896	10.7414	0.1886	10.4999	10.2203	2.6588	0.0566	0.0754	0.066
M-014	round	18	2.7979	48.7778	5.9463	17.1919	0.056	0.0696	11.8251	1.1984	0.1	11.5612	0.1927	99.7169	85.4607		M-014	47.6239	1.0452	14.9722	1.3394	11.0799	0.1655	10.8311	10.3037	2.4388	0.0523	0.061	0.0871
M-X1	round	14	2.8707	49.3425	5.204	17.4219	0.0574	0.0986	12.1221	1.2023	0.0591	11.2595	0.1854	99.8234	85.3436		M-X1	47.8609	1.0202	14.8093	1.338	10.9983	0.1615	10.8814	10.3036	2.4399	0.051	0.085	0.051
M-015	oval	18	2.8904	48.8999	5.1948	17.1914	0.0577	0.0935	11.8941	1.2436	0.0594	11.1758	0.163	98.8636	85.3787		M-015	47.8959	1.0645	14.757	1.3443	11.0098	0.1374	10.9227	10.2072	2.481	0.0515	0.0773	0.0515
M-017	round	15	3.0608	48.7783	4.1779	18.189	0.0612	0.1027	12.3071	1.2134	0.0443	10.6125	0.177	98.7241	85.328		M-017	47.6224	1.0157	15.2684	1.3103	10.8463	0.1511	10.7167	10.3328	2.5685	0.0504	0.0839	0.0336
M-018	oval	15	2.9689	49.1569	4.2472	18.2158	0.0574	0.1062	12.2788	1.2858	0.056	10.5759	0.1839	99.1329	85.5119		M-018	47.766	1.078	15.2261	1.289	10.7652	0.1504	10.7888	10.2622	2.482	0.0501	0.0919	0.0501
M-019	elonged	7	3.1907	49.5449	3.835	18.5093	0.0706	0.0782	12.4377	1.2337	0.0682	10.4417	0.1804	99.5905	85.5119		M-019	47.7846	1.0111	15.2159	1.3056	10.753	0.148	10.7525	10.2261	2.6223	0.0575	0.0658	0.0575
M-020	elonged	6	3.4939	49.2033	3.6342	18.7997	0.0519	0.0994	11.9496	1.2478	0.0602	10.4605	0.1514	99.1518	85.328		M-020	47.668	1.0322	15.524	1.3262	10.8944	0.1239	10.5084	9.8676	2.8818	0.0413	0.0826	0.0495
M-021	oval	8	3.3139	49.825	3.2798	19.06	0.0667	0.0747	12.1663	1.2713	0.1001	10.2754	0.1676	99.6007	85.0435		M-021	47.8713	1.031	15.4731	1.3051	10.8909	0.138	10.529	9.8797	2.6871	0.0568	0.0568	0.0812
M-022	oval	7	3.7635	49.7496	3.2545	19.446	0.0656	0.082	11.3088	1.3056	0.0149	9.2145	0.1648	98.37	83.8705		M-022	48.895	1.1437	16.9815	1.1684	9.7765	0.1397	8.5979	9.8746	3.2828	0.0611	0.0698	0.0087
M-023	oval	21	2.8554	48.5862	5.69945	17.3678	0.0549	0.0806	11.8013	1.15815	0.03465	11.6916	0.19225	99.5226	85.1215		M-023	47.4441	1.0007	14.9854	1.3654	11.2917	0.1639	10.9634	10.18	2.4674	0.0431	0.069	0.0259
M-024	elonged	9	3.3162	49.1497	4.1196	18.2828	0.0859	0.1024	11.7142	1.2221	0.0853	10.451	0.1985	98.7275	85.2186		M-024	48.0279	1.0363	15.5281	1.297	10.682	0.1699	10.2536	9.9472	2.8202	0.0765	0.0849	0.0765
M-025	trangel	15	2.9242	48.2636	5.3187	17.5227	0.043	0.0717	11.9632	1.1643	0.0793	11.5934	0.2095	99.1536	85.2186		M-025	47.2211	0.993	14.9973	1.3771	11.34	0.1798	10.9918	10.2379	2.4995	0.0342	0.0599	0.0685
M-026	trangel	12	2.9998	49.0275	5.0286	17.9342	0.0523	0.0746	11.8278	1.1651	0.0693	11.4927	0.2174	99.8893	85.2186		M-026	47.4602	0.9823	15.0528	1.3599	11.2827	0.1847	11.0675	9.9317	2.5186	0.042	0.0588	0.0588
M-029	round	13	3.1257	49.8168	4.0316	18.3457	0.0785	0.0783	12.0441	1.1672	0.0801	10.261	0.1886	99.2176	85.3854		M-029	48.2864	0.9771	15.3244	1.2645	10.5306	0.1587	10.5892	10.0548	2.6139	0.0668	0.0668	0.0668
M-031	round	10	3.7203	49.7529	4.6487	19.0634	0.0668	0.0801	10.9115	1.1566	0.0538	9.7439	0.1751	99.3731	85.243		M-031	48.7276	1.0259	16.856	1.1506	9.6936	0.1592	9.2721	9.6484	3.2898	0.0619	0.0707	0.0442
M-033	round	11	3.6361	49.5665	5.1734	18.761	0.048	0.0794	10.5874	1.176	0.0572	10.1478	0.1607	99.3935	85.328		M-033	48.5616	1.0431	16.5835	1.1797	9.9609	0.1414	9.7828	9.3613	3.2177	0.0442	0.0707	0.053
M-034	elonged	10	3.0352	48.8161	5.3945	17.4477	0.0701	0.072	11.6368	1.1251	0.0854	11.1208	0.1873	98.9911	84.3788		M-034	48.0488	1.0028	15.4854	1.313	10.8303	0.1686	9.9198	10.3295	2.6977	0.0621	0.0621	0.0799
M-035	round	9	3.2719	49.2559	4.7087	17.9456	0.0921	0.1102	11.468	1.2303	0.097	10.517	0.1793	98.876	85.2983		M-035	48.187	1.0556	15.4044	1.2783	10.5217	0.1545	10.4913	9.8434	2.8063	0.0772	0.0944	0.0858
M-036	elonged	5	3.0553	49.3262	4.3831	17.8009	0.0739	0.1241	11.9435	1.2889	0.0457	10.5371	0.1838	98.7626	85.2983		M-036	48.1829	1.0955	15.1158	1.2945	10.6795	0.1529	10.537	10.1395	2.5986	0.0594	0.1019	0.0425
M-037	round	15	2.9589	48.5157	5.8151	17.8454	0.0541	0.0699	11.477	1.2165	0.0709	10.6684	0.1636	98.8555	85.5481		M-037	47.8777	1.0843	15.8645	1.2204	10.3706	0.1422	10.4376	10.203	2.6308	0.0444	0.0622	0.0622
M-039	oval	21	2.8465	48.3511	5.9316	17.1375	0.0516667	0.0807667	11.6452	1.15017	0.0636667	11.7054	0.184433	99.1479	84.4563		M-039	47.576	1.019	15.188	1.3606	11.2574	0.1595	10.4224	10.3232	2.5254	0.0443	0.0709	0.0532
M-040	oval	12	3.2303	49.8983	3.3509	18.8637	0.0815	0.0925	12.4614	1.1695	0.0327	9.9738	0.151	99.3056	85.197		M-040	48.1826	0.9647	15.5512	1.266	10.5548	0.1237	10.2547	10.274	2.6633	0.066	0.0742	0.0247
M-041	elonged	14	3.1969	49.3528	3.773	18.6448	0.058	0.09565	12.0263	1.21505	0.05215	10.6852	0.17995	99.2798	84.8594		M-041	47.731	1.0059	15.3686	1.3278	11.0656	0.1484	10.6225	9.9187	2.6384	0.0495	0.0824	0.0412
M-044	oval	13	3.2296	49.1228	4.2901	18.4432	0.0554	0.0953	11.8012	1.1872	0.0468	10.729	0.1835	99.184	85.2446		M-044	47.7158	0.9941	15.4049	1.3102	10.8861	0.1504	10.8068	9.8578	2.6984	0.0501	0.0835	0.0418
M-045	oval	14	3.243	49.6643	3.7754	18.7799	0.066	0.0748	12.0167	1.195	0.1289	10.7307	0.1771	99.8519	85.0752		M-045	47.7528	0.9838	15.3957	1.3253	11.0513	0.1476	10.6122	9.8539	2.6561	0.0574	0.0574	0.1066
M-046	oval	25	2.9061	48.7378	5.25567	17.6434	0.0612333	0.0850333	11.8085	1.17827	0.0779333	11.1404	0.2014	99.0957	85.1784		M-046	47.745	1.0223	15.2822	1.3111	10.9342	0.1733	10.5803	10.2315	2.521	0.052	0.078	0.0693
M-047	round	36	2.95273	48.69	5.73483	17.3697	0.0509333	0.0673	11.6627	1.18033	0.0632333	11.1511	0.1732	99.1152	85.4002		M-047	47.8272	1.0345	15.2288	1.3052	10.8086	0.149	10.6798	10.2227	2.5864	0.0438	0.0614	0.0526
M-049	round	40	2.78143	48.3268	7.33657	16.6672	0.0573333	0.0803667	11.3001	1.08927	0.0796667	11.4744	0.182333	99.3969	85.4258		M-049	47.769	0.9966	15.2413	1.295	10.7388	0.1646	10.7204	10.3315	2.5417	0.0549	0.0731	0.0731
M-050	elonged	10	2.9029	48.6107	4.915	17.647	0.0695	0.0693	11.9548	1.2228	0.0406	11.4841	0.1894	99.106	83.5675		M-050	47.6962	1.0693	15.4701	1.3651	11.3036	0.1665	9.7554	10.4741	2.5418	0.0614	0.0614	0.0351
M-051	oval	17	2.84965	48.2951	6.9937	16.9406	0.0645	0.07395	11.2777	1.1137	0.0509	11.9123	0.17075	99.743	85.2581		M-051	47.3998	0.989	15.0935	1.3526	11.1832	0.1515	11.0803	10.0504	2.5393	0.0535	0.0624	0.0445
M-052	oval	11	3.0493	48.7024	6.0379	17.427	0.0801	0.0801	11.4171	1.1783	0.0649	11.3734	0.1558	99.5661	85.2581		M-052	47.7199	1.0413	15.3806	1.3175	10.88	0.1412	10.5568	10.0772	2.6914	0.0706	0.0706	0.0529
M-053	oval	10	2.944	48.4493	5.5352	17.2941	0.0506	0.0915	11.7049	1.1769	0.0717	11.9874	0.2135	99.5191	84.6889		M-053	47.3087	1.018	14.917	1.4144	11.5945	0.1812	10.7543	10.0942	2.5365	0.0431	0.0776	0.0604
M-054	round	18	2.7737	48.13	6.9489	16.653	0.0628	0.0945	11.2484	1.0894	0.0352	11.3672	0.1867	98.5898	85.263		M-054	47.8435	0.9936	15.1768	1.3011	10.7922	0.1732	10.767	10.2546	2.5249	0.0547	0.082	0.0365
M-055	elonged	17	2.93147	48.0415	7.30503	16.6907	0.0639	0.0716667	10.9578	1.0915	0.0780667	11.7381	0.191433	99.1612	84.9865		M-055	47.5938	0.9987	15.2927	1.3356	11.0022	0.1741	10.6834	10.0424	2.6847	0.055	0.0641	0.0733
M-056	round	19	2.7302	48.3376	7.23975	16.6054	0.0269	0.08955	11.1943	1.12735	0.0481	11.4024	0.17075	98.9723	85.2066		M-056	48.0441	1.0488	15.4169	1.2783	10.7156	0.1578	10.2605	10.3862	2.5339	0.0278	0.0835	0.0464
M-059	oval	12	2.7536	48.4335	6.5032	16.8892	0.0712	0.0852	11.4538	1.1543	0.039	11.7552	0.2018	99.3399	85.4682		M-059	47.5903	1.0172	14.9396	1.3501	11.1825	0.1769	11.0064	10.1278	2.4324	0.0619	0.0796	0.0354
M-060	oval	21	2.85645	48.4134	7.49265	16.7863	0.06065	0.08255	10.9702	1.0694	0.0678	11.3512	0.1882	99.3389	85.3264		M-060	47.9532	0.9896	15.5277	1.269	10.605	0.1757	10.4954	10.1452	2.645	0.0555	0.074	0.0647
M-062	triangle	48	2.8975	48.0358	8.4752	16.4431	0.0465	0.1053	10.3394	1.0387	0.0521	11.3626	0.1896	98.9857	85.4033		M-062	48.0332	0.9967	15.7548	1.2536	10.5062	0.1821	10.3841	9.909	2.7791	0.0479	0.1054	0.0479
M-063	round	7	2.9225	48.8663	4.6714	17.9278	0.0586	0.0867	11.9199	1.2221	0.0771	11.0654	0.1673	98.9848	84.6337		M-063	47.7804	1.0458	15.3694	1.3199	11.0694	0.1457	10.3516	10.2177	2.503	0.0514	0.0771	0.0686
M-064	cave	13	3.0028	48.4269	5.6426	17.4711	0.0413	0.0782	11.7392	1.1345	0.0684	11.1835	0.1815	98.9701	82.7543		M-064	48.0974	1.049	16.218	1.3003	10.6975	0.1671	8.6107	10.8987	2.785	0.0371	0.0743	0.065
M-065	cave	14	2.7511	47.921	6.8417	16.7227	0.0437	0.0718	11.2919	1.1056	0.0337	11.8318	0.1772	98.7921	82.7543		M-065	47.8994	1.0548	15.8878	1.3387	11.0977	0.171	9.0764	10.7281	2.6131	0.038	0.0665	0.0285
M-066	oval	12	2.8827	48.6296	5.7569	17.4155	0.0312	0.0726	11.7369	1.1163	0.0753	11.2067	0.1857	99.1096	85.2383		M-066	47.7524	0.9814	15.265	1.3025	10.8627	0.1665	10.7002	10.2877	2.5237	0.0263	0.0613	0.0701
M-067	oval	16	2.78	48.5528	6.5584	16.7955	0.0555	0.0781	11.4295	1.133	0.0565	11.7149	0.2147	99.3688	85.4087		M-067	47.6827	0.9991	14.854	1.3489	11.1162	0.1857	11.0726	10.106	2.458	0.0531	0.0707	0.0531
M-068	elonged	7	3.089	48.9567	4.1436	18.1402	0.0593	0.0851	11.9736	1.1846	0.0594	10.9535	0.153	98.798	84.6751		M-068	47.7248	0.9897	15.2149	1.3486	11.1844	0.1258	10.604	10.0398	2.5917	0.0503	0.0755	0.0503
M-069	oval	10	3.7212	49.8918	4.9785	19.0411	0.07	0.0744	10.4531	1.1897	0.026	9.7818	0.1728	99.4005	84.6646		M-069	49.0605	1.0762	17.2189	1.1275	9.5887	0.1537	8.8061	9.4505	3.3642	0.0633	0.0633	0.0271
M-071	cave	24	2.91453	48.251	7.2976	16.8437	0.0664667	0.0677	10.9661	1.09007	0.0350667	11.6572	0.197033	99.3863	84.6646		M-071	47.7671	1.0074	15.5638	1.311	10.8955	0.1848	10.2759	10.1387	2.6895	0.0647	0.0647	0.037
M-072	cave	14	3.0121	48.5705	5.24015	17.6487	0.05425	0.0697	11.72	1.1805	0.04865	11.2729	0.1933	99.0106	84.6646		M-072	47.6382	1.0234	15.3074	1.3348	11.0627	0.1648	10.5462	10.1645	2.6105	0.0434	0.0607	0.0434
M-073	oval	7	3.267	49.2338	4.2609	18.3946	0.0773	0.0613	11.9359	1.2321	0.1536	10.7742	0.1579	99.5486	84.9246		M-073	47.7527	1.0363	15.4941	1.3168	10.8712	0.1348	10.3349	10.0598	2.7551	0.0674	0.0506	0.1264
M-074	oval	10	3.0936	48.7278	4.7562	17.4734	0.0695	0.0936	11.6063	1.2789	0.1018	10.9226	0.1856	98.3095	84.9246		M-074	47.9643	1.1049	15.0799	1.3349	10.9316	0.164	10.5071	10.0216	2.6673	0.0604	0.0777	0.0863
M-075	round	7	3.1124	48.7513	3.5547	18.4194	0.044	0.0745	12.3296	1.2748	0.056	10.7368	0.1567	98.5101	84.9246		M-075	47.4405	1.0425	15.1209	1.3645	11.2926	0.1313	10.7934	10.1216	2.553	0.0328	0.0575	0.0493
M-076	oval	6	3.2214	48.8214	3.6624	18.4626	0.0697	0.0788	11.8902	1.2479	0.0656	10.7417	0.2098	98.4714	84.9246		M-076	47.615	1.0392	15.3464	1.355	11.2245	0.1746	10.5011	9.8845	2.6769	0.0582	0.0665	0.0582
M-077	oval	14	2.86595	48.2876	6.3773	17.0587	0.06015	0.0735	11.5394	1.121	0.0381	11.6991	0.18795	99.3088	85.174		M-077	47.4679	0.9908	15.0914	1.3518	11.1433	0.1681	10.8891	10.2084	2.5388	0.0531	0.0619	0.0354
M-078	oval	11	3.2755	49.4186	4.4271	18.4247	0.0661	0.0853	11.7327	1.1876	0.0416	10.2595	0.169	99.0876	85.3683		M-078	48.2282	1.0191	15.775	1.241	10.3572	0.1456	10.208	10.0456	2.809	0.0599	0.0771	0.0343
M-080	round	7	3.053	49.1069	3.585	18.4779	0.056	0.1111	12.2813	1.2379	0.0577	10.843	0.1807	98.9906	84.662		M-080	47.4386	1.0003	14.9072	1.3687	11.3492	0.1452	11.239	9.9059	2.4603	0.0484	0.0887	0.0484
M-082	elonged	12	2.83815	48.4958	5.51845	17.4222	0.0363	0.07525	11.8518	1.1679	0.0766	11.2536	0.18875	98.9247	85.4943		M-082	47.6182	1.0153	15.1174	1.3206	10.9873	0.1649	10.8545	10.2836	2.4646	0.0347	0.0694	0.0694
M-084	oval	7	3.158	48.5652	4.2002	18.1735	0.0486	0.0838	12.2443	1.189	0.0838	10.4338	0.154	98.3341	85.3549		M-084	47.6215	1.0029	15.3139	1.2992	10.6933	0.1264	10.7865	10.316	2.6633	0.0421	0.0674	0.0674
M-085	elonged	6	3.2705	49.248	3.4447	18.8022	0.1043	0.0881	11.9535	1.1972	0.0814	9.9835	0.1618	98.3353	84.3686		M-085	48.2527	1.0236	16.0371	1.2578	10.5488	0.1365	9.5298	10.1938	2.7894	0.0853	0.0768	0.0682
M-086	elonged	12	3.1998	48.5959	5.6375	17.4688	0.057	0.0783	11.4003	1.1647	0.038	11.173	0.1912	99.0044	84.3686		M-086	47.9539	1.0411	15.6795	1.3173	10.7873	0.1705	9.7851	10.2316	2.872	0.0539	0.0718	0.0359
M-087	elonged	20	3.01885	48.3538	5.6591	17.285	0.03975	0.07255	11.6703	1.1469	0.04915	11.4405	0.1547	98.8909	84.901		M-087	47.5969	1.0101	15.187	1.353	11.0988	0.1318	10.5787	10.2506	2.6527	0.0351	0.0615	0.0439
M-088	cave	10	3.4952	49.3613	4.2352	18.3751	0.0696	0.0705	11.7578	1.2925	0.0685	10.6992	0.1547	99.5795	82.5813		M-088	48.2272	1.1381	16.2155	1.3184	10.6393	0.1323	8.6809	10.3751	3.0878	0.0618	0.0618	0.0618
M-089	oval	16	3.29217	49.4194	4.98937	18.1983	0.0637	0.0886333	11.345	1.20153	0.0503333	10.4941	0.1697	99.3123	85.4706		M-089	48.2631	1.0377	15.7384	1.2429	10.3756	0.147	10.371	9.8063	2.845	0.0519	0.0778	0.0432
M-090	elonged	14	3.3036	49.5579	3.6732	18.7351	0.0723	0.0515	12.234	1.207	0.0895	10.3875	0.2074	99.519	85.4706		M-090	47.7215	0.9832	15.227	1.3125	10.803	0.1706	10.9928	9.9373	2.6814	0.0569	0.0406	0.0731
M-091	oval	14	3.2456	49.5952	5.0025	18.1206	0.0676	0.0856	11.4135	1.2057	0.0787	10.4568	0.1608	99.4324	85.3899		M-091	48.3559	1.0448	15.6457	1.2389	10.3305	0.1382	10.3806	9.852	2.8062	0.0604	0.0777	0.0691
M-093	oval	14	3.3636	49.6851	4.9641	18.8158	0.0575	0.0771	11.1626	1.1749	0.0593	10.1404	0.1798	99.6802	85.313		M-093	48.4425	1.0198	16.4033	1.1718	10.022	0.1569	9.954	9.7269	2.9285	0.0523	0.0697	0.0523
M-094	oval	8	3.2549	49.7151	3.844	18.8344	0.0506	0.0685	11.8814	1.229	0.1477	10.4153	0.1619	99.6028	85.3552		M-094	47.9293	1.011	15.4778	1.2818	10.7591	0.1315	10.7509	9.7651	2.6714	0.0411	0.0575	0.1233
M-095	oval	11	3.4295	48.7816	5.1856	18.3608	0.0542	0.058	11.1979	1.2076	0.0398	10.3656	0.1959	98.8765	85.2088		M-095	48.0825	1.0752	16.3145	1.2197	10.1965	0.1777	9.8007	9.9522	3.0479	0.0444	0.0533	0.0355
M-097	cave	10	3.137	48.8457	4.7928	17.6669	0.0865	0.0929	11.5957	1.1619	0.0814	11.5535	0.2079	99.2222	83.2228		M-097	47.8404	1.0154	15.4668	1.3947	11.3709	0.1838	9.5983	10.1536	2.7485	0.0788	0.0788	0.07
M-098	oval	12	2.9787	48.6536	6.1093	17.5094	0.0453	0.0726	11.4587	1.1385	0.0649	11.5536	0.1776	99.7623	85.2636		M-098	47.5052	0.9926	15.2465	1.3295	11.041	0.1567	10.9982	9.9786	2.5948	0.0435	0.061	0.0522
M-099	oval	34	2.84987	48.2591	8.05163	16.5295	0.0676333	0.0771	10.8806	1.08417	0.075	11.249	0.175067	99.2987	85.528		M-099	48.0101	1.0209	15.6249	1.2508	10.4195	0.1701	10.3079	10.2843	2.694	0.0662	0.0756	0.0756
M-101	oval	8	3.0327	49.1657	4.2814	18.1753	0.0618	0.0767	12.2071	1.2154	0.0549	11.0154	0.1899	99.4763	84.6549		M-101	47.7129	1.0284	15.3244	1.3379	11.1154	0.1602	10.3144	10.2922	2.5541	0.0506	0.0674	0.0421
M-102	elonged	21	2.8831	48.4092	5.90097	17.2951	0.0478333	0.0607333	11.5708	1.1752	0.0601667	11.7102	0.184467	99.2978	83.0281		M-102	47.8297	1.0797	15.829	1.3482	11.1609	0.1647	9.2109	10.5862	2.6351	0.0457	0.0549	0.0549
M-104	round	13	2.9769	49.0462	4.529	17.9252	0.0673	0.0915	12.1518	1.3409	0.0588	10.8732	0.1812	99.2418	85.2418		M-104	47.7362	1.1323	15.1506	1.3163	10.9063	0.1521	10.6356	10.2666	2.5181	0.0591	0.076	0.0507
M-105	oval	33	2.79867	47.9416	7.0725	16.7736	0.0519	0.073	11.1788	1.10963	0.0641	11.6574	0.206033	98.9273	85.1868		M-105	47.5209	1.0084	15.2347	1.3255	11.0121	0.1908	10.8439	10.1565	2.5437	0.0454	0.0636	0.0545
M-106	cave	6	3.3626	49.0486	4.0782	18.5102	0.0652	0.0783	11.9588	1.2636	0.0689	10.5092	0.1798	99.1233	83.4226		M-106	48.0545	1.1041	16.2203	1.2934	10.6113	0.1577	8.9409	10.4805	2.9444	0.0613	0.0701	0.0613
M-107	round	16	3.0103	48.8606	4.6547	17.875	0.0845	0.0866	11.9391	1.1604	0.0864	11.1008	0.1762	99.0348	84.9583		M-107	47.6603	0.9822	15.14	1.3423	11.1054	0.1524	10.7382	10.1103	2.5487	0.0677	0.0762	0.0762
M-108	cave	42	3.0175	48.4649	7.5494	16.7398	0.0794	0.0536	10.8272	1.1364	0.05	11.55	0.204	99.6722	85.4069		M-108	47.8477	1.0508	15.4296	1.3057	10.7292	0.1843	10.521	9.9822	2.7836	0.0737	0.0461	0.0461
M-109	elonged	26	2.88437	48.3103	6.15437	17.2172	0.05	0.0777667	11.4973	1.1225	0.0554667	11.3382	0.1728	98.8802	85.4125		M-109	47.6778	0.9952	15.3015	1.3105	10.9072	0.1511	10.7101	10.2187	2.5591	0.0444	0.0711	0.0533
M-111	oval	8	3.0834	49.5613	3.6579	18.3319	0.0748	0.1106	12.3739	1.3035	0.0575	10.2506	0.1773	98.9826	85.4125		M-111	48.049	1.0754	15.1626	1.2916	10.705	0.1489	10.5888	10.2325	2.5478	0.0579	0.091	0.0496
M-112	round	19	3.25715	49.4793	4.60435	18.766	0.0666	0.0859	11.3524	1.18745	0.12045	9.95635	0.17075	99.0468	85.4006		M-112	48.4179	1.0316	16.2721	1.1701	10.0277	0.1474	10.0248	9.8395	2.8262	0.0607	0.078	0.104
M-112x	elonged	11	3.152	49.5489	3.8394	18.6618	0.0759	0.0705	12.2625	1.207	0.1394	10.4292	0.1848	99.5716	85.4006		M-112x	47.8013	0.9949	15.3425	1.2916	10.7614	0.148	10.7515	10.0804	2.59	0.0658	0.0576	0.1151
M-113	round	11	2.9335	48.6944	4.0969	18.0627	0.0294	0.0478	12.2116	1.2758	0.0985	11.1485	0.1925	98.7916	85.1487		M-113	47.3947	1.0606	14.9649	1.3721	11.4142	0.1574	10.9415	10.1175	2.4279	0.0249	0.0414	0.0829
M-114	round	11	3.0843	48.8035	3.8818	18.3813	0.074	0.1156	12.0826	1.1967	0.0596	10.4615	0.1791	98.32	85.0569		M-114	47.7923	1.0115	15.4924	1.2988	10.8651	0.1517	10.3992	10.1822	2.5961	0.059	0.1011	0.0506
M-116	round	9	3.1095	49.1598	3.8426	18.3412	0.0498	0.0858	12.3488	1.2263	0.0481	10.9321	0.1827	99.3267	84.6991		M-116	47.5522	1.0137	15.1145	1.3634	11.2489	0.1483	10.6614	10.178	2.563	0.0412	0.0742	0.0412
M-117	round	57	2.82287	48.0774	7.74427	16.5647	0.0531667	0.0766667	10.96	1.0906	0.0759	11.6104	0.1781	99.254	85.315		M-117	47.6878	1.0089	15.3283	1.3028	10.8181	0.1666	10.7379	10.1448	2.6103	0.0463	0.074	0.074
M-118	oval	10	2.9846	48.5675	6.1151	17.4028	0.0688	0.0846	11.0884	1.1462	0.1415	11.4607	0.1902	99.2503	85.4787		M-118	47.6557	1.0065	15.2287	1.3214	11.0082	0.1663	11.045	9.7061	2.6081	0.0613	0.07	0.1225
M-120	oval	8	3.2859	48.9831	4.3394	18.0104	0.0681	0.0577	11.9596	1.2127	0.0483	11.1149	0.1961	99.2763	85.4787		M-120	47.2774	0.9733	14.4866	1.4052	11.2051	0.1609	12.0803	9.6202	2.6464	0.0563	0.0483	0.0402
M-121	round	13	3.1074	48.9286	5.5764	17.8116	0.061	0.0705	11.6351	1.1926	0.0471	10.6089	0.1814	99.2206	85.3947		M-121	48.0763	1.0538	15.7712	1.2355	10.3082	0.1594	10.1746	10.3075	2.754	0.0531	0.062	0.0443
M-122	round	10	2.8984	48.615	5.8329	17.3476	0.0598	0.0704	11.6072	1.1753	0.1018	11.1191	0.174	99.0014	85.3947		M-122	47.8014	1.0353	15.2222	1.2957	10.7711	0.1492	10.7928	10.1862	2.5443	0.0526	0.0614	0.0877
M-123	round	11	2.9351	48.8496	4.572	17.7912	0.052	0.0817	12.055	1.228	0.1006	10.9389	0.2007	98.8047	85.2106		M-123	47.7495	1.044	15.0991	1.326	11.0033	0.1697	10.6821	10.2358	2.4953	0.0424	0.0679	0.0849
M-124	oval	10	2.9268	49.1831	4.711	17.8185	0.0514	0.0951	11.9663	1.2118	0.0944	10.9407	0.199	99.1979	85.3402		M-124	47.8754	1.023	15.0654	1.3128	10.9295	0.1691	10.8252	10.1197	2.4771	0.0423	0.0845	0.0761
M-125	oval	17	2.82485	48.0832	6.7647	16.8548	0.0433	0.07155	11.253	1.10485	0.0333	11.5691	0.1823	98.7849	84.8386		M-125	47.8027	1.0121	15.5038	1.3151	10.9711	0.1656	10.1549	10.3512	2.5947	0.0368	0.0644	0.0276
M-126	oval	7	2.9761	48.578	4.602	17.7839	0.0394	0.0929	12.1707	1.2472	0.0591	11.1771	0.166	98.8924	84.8386		M-126	47.4746	1.0599	15.0763	1.359	11.2034	0.1441	10.6753	10.3194	2.5268	0.0339	0.0763	0.0509
M-127	cave	26	2.81047	48.1161	8.14247	16.5372	0.0526	0.0839667	10.7462	1.09023	0.0442333	11.6006	0.199533	99.4237	85.1615		M-127	47.8232	1.0291	15.6166	1.2805	10.7266	0.1888	10.3717	10.1498	2.6531	0.0472	0.0755	0.0378
M-129	oval	7	3.0757	49.0385	4.6823	17.8216	0.0599	0.0837	12.0778	1.1813	0.0563	11.0523	0.1834	99.3128	85.1615		M-129	47.7044	0.9965	15.0481	1.3437	11.0113	0.152	10.7731	10.201	2.6009	0.0507	0.0676	0.0507
M-130	cave	21	2.81943	48.0505	7.387	16.6602	0.0570333	0.0752333	11.0487	1.07863	0.0789	11.8336	0.183967	99.2732	85.1615		M-130	47.5499	0.9884	15.2468	1.3354	11.0705	0.1647	10.7494	10.1127	2.5808	0.0549	0.0732	0.0732
M-131	elonged	12	2.96417	48.4613	6.155	17.2206	0.0628667	0.0817	11.4724	1.14193	0.0892	11.6018	0.186833	99.4377	85.1615		M-131	47.5656	1.0073	15.2162	1.3434	11.0814	0.1679	10.664	10.1353	2.6156	0.053	0.0707	0.0795
M-132	round	13	2.8452	48.3314	7.044	16.7369	0.0499	0.0782	11.3082	1.036	0.021	11.3508	0.2022	99.004	85.1615		M-132	47.9289	0.9544	15.3625	1.2921	10.6992	0.1835	10.4469	10.3793	2.6155	0.0459	0.0734	0.0184
M-135	oval	22	2.82003	48.2939	7.11873	16.8981	0.0693667	0.0865333	11.3577	1.10227	0.0654	11.4446	0.1795	99.4362	85.2975		M-135	47.7011	1.0051	15.4423	1.2898	10.7362	0.1645	10.4939	10.3802	2.5768	0.064	0.0822	0.064
M-136	oval	12	2.7718	48.113	6.9705	16.8147	0.0585	0.0635	11.2962	1.0924	0.0808	11.4952	0.1632	98.9198	85.3578		M-136	47.681	0.9903	15.2729	1.3061	10.8835	0.1454	10.7555	10.2668	2.5167	0.0545	0.0545	0.0727
M-137	oval	16	2.9351	48.8787	6.0281	17.3279	0.0486	0.086	11.6205	1.1682	0.0294	11.1602	0.1923	99.4749	85.3578		M-137	47.9196	1.0333	15.3051	1.2899	10.7018	0.1678	10.5735	10.2623	2.5965	0.0442	0.0795	0.0265
M-138	elonged	7	3.1834	48.7516	4.8983	18.1047	0.0575	0.0677	11.7267	1.2115	0.038	11.0264	0.1938	99.2597	85.273		M-138	47.5844	1.0345	15.4745	1.3189	10.9246	0.1624	10.6082	10.0285	2.7187	0.0513	0.0598	0.0342
M-139	round	30	2.89083	48.2445	5.86657	17.5037	0.0421333	0.0734667	11.9826	1.14397	0.0547	11.3421	0.182567	99.3271	85.1519		M-139	47.339	0.9972	15.3086	1.3186	10.9373	0.1575	10.794	10.4798	2.5281	0.035	0.0612	0.0437
M-140	elonged	6	3.1777	49.4703	3.3774	19.1241	0.0692	0.0697	12.5161	1.259	0.0562	9.9653	0.1699	99.2548	85.1519		M-140	47.8398	1.0392	15.769	1.2517	10.5544	0.1402	10.2924	10.3257	2.6227	0.0577	0.0577	0.0495
M-142	triangle	22	2.9696	48.4038	6.03127	17.1818	0.0591333	0.0884333	11.5882	1.17557	0.109267	11.6572	0.1921	99.4563	84.4933		M-142	47.5792	1.0542	15.3488	1.3553	11.1283	0.1697	10.1241	10.3546	2.6534	0.0536	0.0804	0.0983
M-143	oval	9	3.2092	49.8158	3.32	18.8826	0.0475	0.0867	12.3267	1.3158	0.0808	10.0316	0.1691	99.2859	85.4845		M-143	48.0075	1.075	15.3754	1.2746	10.6529	0.1384	10.6416	10.0412	2.6141	0.0407	0.0733	0.0651
M-144	round	17	3.0473	49.0862	4.4631	18.1084	0.0623	0.1029	11.9515	1.2262	0.0585	10.7907	0.1927	99.0897	85.5848		M-144	47.7417	1.0286	15.1445	1.3116	10.8928	0.1589	10.9942	9.9932	2.5506	0.0502	0.0836	0.0502
M-145	oval	12	3.0781	49.2878	4.26	18.2823	0.0597	0.1057	12.1546	1.2771	0.0648	10.2754	0.1429	98.9883	85.3371		M-145	48.0557	1.0845	15.4882	1.2519	10.4675	0.1186	10.4348	10.2944	2.6096	0.0508	0.0932	0.0508
M-146	oval	12	3.4027	49.9094	3.9012	18.9639	0.0643	0.0854	11.6917	1.2596	0.0454	9.8831	0.1696	99.3766	85.3576		M-146	48.412	1.0635	16.0037	1.209	10.1858	0.1435	10.0765	9.8673	2.8699	0.0506	0.076	0.0422
M-147	oval	8	3.5092	49.8198	3.4061	19.2849	0.0625	0.0826	11.9011	1.2725	0.0455	9.6451	0.1597	99.189	85.3586		M-147	48.2817	1.0611	16.1085	1.2147	10.1972	0.1337	9.9692	9.9425	2.9326	0.0501	0.0668	0.0418
M-149	elonged	8	3.5222	49.5692	4.2497	19.1596	0.0686	0.098	11.4025	1.2491	0.0461	9.7613	0.178	99.3044	85.2252		M-149	48.3751	1.0809	16.5684	1.1676	9.9033	0.1557	9.657	9.858	3.0439	0.0605	0.0865	0.0432
M-150	oval	15	3.0009	48.6362	5.4564	17.5703	0.0628	0.0682	11.6692	1.1608	0.0599	11.6947	0.196	99.5754	85.2677		M-150	47.3627	0.9885	14.9721	1.38	11.3533	0.1704	11.1104	9.9444	2.5564	0.0511	0.0596	0.0511
M-151	elonged	29	2.82383	48.07	7.42607	16.8021	0.0609333	0.0812333	11.0439	1.0984	0.0602333	11.6612	0.182	99.3099	85.2677		M-151	47.5646	1.0065	15.3723	1.3089	10.916	0.1647	10.8019	10.1018	2.5803	0.0549	0.0732	0.0549
M-152	elonged	8	3.1882	48.9303	4.5661	18.146	0.0497	0.0928	12.0745	1.1932	0.0717	11.1542	0.2092	99.676	85.2677		M-152	47.3621	0.9893	15.0888	1.3591	11.125	0.1746	11.0404	10.0342	2.652	0.0416	0.0748	0.0582
M-153	oval	13	3.2105	48.8768	4.7219	17.9263	0.0623	0.0696	11.9468	1.23	0.0169	11.099	0.1813	99.3413	85.1757		M-153	47.5535	1.0382	15.1348	1.3531	11.0348	0.1519	10.8105	10.087	2.7096	0.0506	0.0591	0.0169
M-154	elonged	8	3.5662	49.4893	4.7144	18.7381	0.0665	0.084	11.1039	1.1856	0.0426	9.8428	0.1455	98.9787	85.1757		M-154	48.5705	1.0445	16.4491	1.1715	9.836	0.1317	9.7533	9.7431	3.1336	0.0614	0.0702	0.0351
M-156	cave	16	3.5115	49.5937	3.4302	19.0066	0.0874	0.1028	12.0457	1.2273	0.0599	10.2614	0.1742	99.5007	83.5555		M-156	48.1271	1.0491	16.2136	1.2986	10.6586	0.145	9.0236	10.2774	2.9937	0.0768	0.0853	0.0512
M-157	oval	20	2.97775	48.6565	5.31055	17.5357	0.07145	0.0746	11.6521	1.2052	0.0619	11.43	0.1909	99.1666	85.1104		M-157	47.5525	1.0354	15.0087	1.3571	11.1915	0.1626	11.0025	9.9687	2.5499	0.0599	0.0599	0.0513
M-158	round	76	2.8786	47.8588	8.44063	16.5391	0.0586333	0.0739	10.4315	1.08117	0.0420333	11.5164	0.1711	99.0919	85.4139		M-158	47.7338	1.0231	15.6687	1.2733	10.6654	0.161	10.7046	9.8806	2.7283	0.0568	0.0663	0.0379
M-159	round	39	2.80927	48.1804	7.4546	16.7398	0.0512333	0.0751667	11.0735	1.1006	0.0566333	11.5462	0.171267	99.2587	85.4139		M-159	47.686	1.0069	15.3237	1.2979	10.8164	0.1556	10.8337	10.1334	2.5723	0.0458	0.0732	0.0549
M-160	oval	17	3.0499	48.5014	5.6728	17.2851	0.051	0.064	11.7102	1.1614	0.0386	11.6311	0.1549	99.3204	84.9198		M-160	47.4551	1.0028	14.9476	1.3812	11.2417	0.1297	10.9518	10.1236	2.6368	0.0432	0.0519	0.0346
M-161	oval	12	2.8894	49.1731	4.4801	18.165	0.0626	0.0922	12.1013	1.1787	0.048	11.1965	0.18	99.5668	84.832		M-161	47.6861	0.9939	15.3038	1.3341	11.2298	0.1516	10.507	10.1913	2.4341	0.0505	0.0758	0.0421
M-162	oval	35	2.77223	48.3999	7.06487	16.7546	0.0475667	0.0842667	11.3587	1.11193	0.0748	11.4537	0.165933	99.2884	85.5768		M-162	47.7892	1.0049	15.1634	1.2988	10.7868	0.1539	10.8305	10.2839	2.5076	0.0453	0.0724	0.0634
M-163	oval	8	3.507	49.8823	3.5702	19.0588	0.0698	0.0805	11.6742	1.2451	0.0347	9.682	0.1443	98.9489	85.2673		M-163	48.4495	1.047	15.9649	1.2162	10.1749	0.1173	10.1644	9.775	2.94	0.0586	0.067	0.0251
M-166	oval	18	2.9577	48.5037	4.8446	17.9337	0.0537	0.0808	12.0733	1.2497	0.05	11.2129	0.181	99.1412	84.9931		M-166	47.4181	1.0702	15.3505	1.3369	11.13	0.1541	10.5185	10.3335	2.5342	0.0428	0.0685	0.0428
M-167	round	10	3.1085	49.5447	3.714	18.5391	0.0805	0.0915	12.113	1.1591	0.054	10.2661	0.1806	98.8509	85.4801		M-167	48.0888	0.9608	15.3566	1.2827	10.7299	0.1491	10.6431	10.0307	2.576	0.0663	0.0745	0.0414
M-168	triangle	12	3.1011	48.9993	3.8813	18.2505	0.0791	0.1062	11.9936	1.2588	0.0131	10.9981	0.1975	98.8786	85.112		M-168	47.5097	1.0303	14.9236	1.3769	11.3583	0.1635	11.1346	9.8046	2.535	0.0654	0.09	0.0082
M-169	oval	13	3.1953	48.6162	3.7776	18.1188	0.0614	0.0729	12.4047	1.2376	0.0707	10.7089	0.1925	98.4565	85.112		M-169	47.4656	1.0309	15.0651	1.368	11.1167	0.158	10.6595	10.3094	2.6605	0.0499	0.0582	0.0582
M-170	oval	16	3.029	48.953	4.0437	18.2079	0.0416	0.0821	12.3388	1.182	0.0697	10.7133	0.1796	98.8407	85.3292		M-170	47.6104	0.9774	15.084	1.3292	11.0074	0.1491	10.9535	10.2216	2.5099	0.0331	0.0663	0.058
M-171	oval	22	3.118	49.7248	3.137	19.1313	0.0693	0.0731	12.4039	1.2133	0.085	10.0726	0.1933	99.2216	84.6179		M-171	48.0392	0.9985	15.7864	1.2713	10.7869	0.1568	9.9637	10.2327	2.5747	0.0578	0.0578	0.0743
M-172	round	17	3.4911	49.4631	4.1905	18.8113	0.0512	0.069	11.5037	1.2685	0.0452	10.4791	0.1732	99.5457	84.6179		M-172	48.0501	1.0828	16.0371	1.2723	10.6027	0.1449	9.8848	9.8047	2.9755	0.0426	0.0597	0.0426
M-173	triangle	15	3.3363	49.2341	4.119	18.4857	0.0554	0.0464	11.8616	1.2418	0.0141	10.7126	0.1615	99.2684	84.9164		M-173	47.8573	1.0476	15.6206	1.318	10.8876	0.1352	10.1911	10.0195	2.8217	0.0507	0.0422	0.0084
M-175	oval	6	3.4633	50.2787	2.6168	19.4974	0.0806	0.0801	12.328	1.308	0.0499	9.2483	0.1747	99.1258	85.2662		M-175	48.3131	1.0555	15.7121	1.2326	10.3034	0.137	10.3545	9.9349	2.7879	0.0645	0.0645	0.0403
M-177	round	16	3.1343	48.5485	5.3665	17.917	0.0389	0.0988	11.5935	1.1547	0.0425	10.7834	0.1485	98.8265	85.4145		M-177	47.8125	1.0109	15.7531	1.2652	10.5766	0.1319	10.3515	10.1885	2.7515	0.0352	0.0879	0.0352
M-178	round	18	2.8206	48.0441	5.25	17.6235	0.0343	0.0666	12.2174	1.1816	0.0713	11.198	0.1668	98.6742	85.4778		M-178	47.2353	1.0149	15.154	1.3289	11.0494	0.1462	10.9899	10.5098	2.4253	0.0258	0.0602	0.0602
M-180	elonged	65	2.8337	48.0819	7.91697	16.7046	0.0591	0.0865667	10.8707	1.08473	0.0622333	11.2676	0.1735	99.1417	85.4778		M-180	47.8362	1.0118	15.6458	1.2513	10.4949	0.1593	10.569	10.1838	2.6513	0.0562	0.0843	0.0562
M-182	round	8	3.4605	49.7435	3.0268	19.3456	0.0658	0.116	12.1449	1.2367	0.0683	9.597	0.1585	98.9637	84.8202		M-182	48.1661	1.0257	16.0057	1.2376	10.3772	0.1323	9.9365	10.0418	2.862	0.0579	0.0993	0.0579
M-183	triangle	34	2.82423	48.037	6.74417	16.8374	0.0715	0.0697667	11.4351	1.13743	0.0552667	11.7996	0.1978	99.2093	85.175		M-183	47.3825	1.021	15.0814	1.3559	11.1656	0.1791	10.8645	10.2454	2.5255	0.0627	0.0627	0.0537
M-185	oval	8	3.7742	50.0397	2.9227	19.6982	0.0873	0.0847	11.8003	1.2787	0.0959	9.3772	0.1774	99.3364	84.8872		M-185	48.2662	1.055	16.2364	1.2234	10.1734	0.1484	9.8421	9.7254	3.1072	0.0742	0.0659	0.0824
M-186	round	42	2.97387	48.6022	5.8712	17.4162	0.0461	0.127633	11.5604	1.18003	0.0881333	10.9189	0.1684	98.9531	85.2363		M-186	47.9932	1.0597	15.6435	1.2624	10.5405	0.1527	10.0574	10.3811	2.6671	0.0449	0.1167	0.0808
M-190	oval	27	3.0126	48.5012	4.9578	17.7763	0.0485333	0.0832333	11.8337	1.1707	0.0605333	11.3777	0.200667	99.0228	85.2393		M-190	47.3719	0.9909	15.058	1.3652	11.2744	0.1694	11.0413	10.0189	2.5492	0.0423	0.0678	0.0508
M-191	oval	18	2.96963	48.6452	5.303	17.5137	0.0515333	0.0728333	11.8809	1.16307	0.0941333	11.1612	0.1903	99.0454	85.0747		M-191	47.7021	1.0057	15.1816	1.3253	10.9369	0.1647	10.6262	10.3002	2.5751	0.0434	0.0607	0.078

## Sheet: Table S5
Table S5. The trace element composition (ppm) of the host glass
Anylysis No.	Sc	V	Cr	Ni	Zn	Rb	Sr	Y	Zr	Nb	Mo	Ba	La	Ce	Pr	Nd	Sm	Eu	Gd	Tb	Dy	Ho	Er	Tm	Yb	Lu	Hf	Ta	Pb	Th	U
Glass-T01	35.6346	201.006	295.272	188.694	80.6847	0.680796	126.827	24.8965	60.6211	1.58363	0.222055	8.46334	2.32678	7.06245	1.18207	6.58203	2.43226	0.822737	3.18526	0.55011	4.33261	0.84796	2.64381	0.376386	2.72113	0.387043	1.56438	0.103467	0.308992	0.14119	0.035883
Glass-T02	35.0014	204.311	295.232	188.497	80.5826	0.75016	127.04	24.4057	56.8886	1.48689	0.2638	8.47742	2.24482	7.28904	1.07737	6.27777	2.11173	0.948468	3.24693	0.565626	3.83568	0.864135	2.68718	0.389285	2.77617	0.369153	1.42499	0.0768106	0.323307	0.15413	0.0368249
Glass-T03	35.3057	201.86	292.034	186.605	80.3476	0.744335	125.126	24.6409	59.2113	1.48531	0.249813	8.3209	2.28097	7.32772	1.05746	6.77955	1.78125	1.00398	3.2546	0.575091	4.03141	0.866261	2.43693	0.315994	2.6966	0.404359	1.48229	0.0597671	0.339187	0.14736	0.0409438
Glass-T04	34.8964	200.599	291.821	182.8	81.7619	0.738121	124.575	25.0355	57.1813	1.45351	0.293148	8.09064	2.24516	7.3725	1.16623	6.20373	1.77991	0.857192	3.34082	0.551491	4.10381	0.850763	2.82243	0.364623	2.69495	0.399514	1.81091	0.0766331	0.428189	0.155802	0.0405093
Glass-T05	36.0563	198.188	294.321	187.907	79.3091	0.689677	125.431	25.3567	58.4358	1.37122	0.163925	8.0816	2.33698	7.30623	1.10252	6.19327	2.14087	0.93748	3.07689	0.604539	3.82384	0.853634	3.05443	0.382926	2.63786	0.380434	1.40806	0.110763	0.302754	0.138649	0.0346517
Glass-T06	35.3144	198.343	293.38	189.798	82.3417	0.659784	126.412	24.6042	60.1375	1.36903	0.330391	7.54251	2.25671	7.22037	1.20126	6.62384	2.04128	0.931757	3.04376	0.580341	4.43743	0.796421	2.69854	0.42147	2.80969	0.395162	1.75562	0.0829529	0.330085	0.114967	0.0455587
Glass-T07	35.8993	199.784	295.008	189.739	81.3607	0.712014	127.22	24.5433	59.1756	1.39664	0.326264	8.79484	2.15694	7.1477	1.0952	5.97986	2.21532	0.87076	3.52495	0.560537	4.03562	0.865885	2.69882	0.332093	2.70915	0.356642	1.41598	0.0798689	0.325148	0.125111	0.0328396
Glass-T08	36.1147	199.448	294.708	186.338	81.7752	0.656679	128.556	24.506	58.9597	1.36978	0.267765	7.9231	2.27029	7.19754	1.13182	6.10312	1.9089	0.882924	3.17192	0.576741	3.84808	0.892033	2.72964	0.351425	2.32584	0.440277	1.55568	0.0748215	0.310282	0.141341	0.0341767
Glass-T09	35.8198	197.009	289.706	182.595	82.5306	0.702861	127.658	24.739	62.0521	1.34525	0.225427	8.61364	2.26323	7.20813	1.23011	6.71583	2.17952	0.905686	3.07682	0.506233	4.11269	0.85145	2.80717	0.377783	2.89401	0.397076	1.35608	0.0800589	0.37209	0.15136	0.033088
Glass-T10	34.9948	194.345	284.268	181.733	80.5877	0.695344	124.917	24.3793	57.8853	1.26533	0.284278	7.81843	2.1531	7.17106	1.161	6.66386	1.90941	0.906985	3.42583	0.505757	3.69108	0.844739	3.00641	0.351218	2.62665	0.342812	1.64412	0.0947725	0.312102	0.111072	0.0326294
Glass-T11	35.7639	196.967	293.931	187.787	81.0334	0.693807	127.899	24.8038	59.2594	1.29168	0.183598	8.16792	2.31216	7.24355	1.15841	6.74957	2.145	0.986586	3.17147	0.545745	3.97157	0.856581	2.82686	0.348253	2.78657	0.401465	1.58939	0.0934121	0.416938	0.153365	0.0368029
Glass-T12	35.8125	195.688	289.517	178.697	81.2486	0.681518	125.433	24.5872	59.9749	1.52852	0.0869559	7.82408	2.2093	7.04981	1.13343	5.46464	2.15332	0.817538	3.28204	0.561755	4.21112	0.869286	2.81359	0.372237	2.23837	0.399946	1.55553	0.0884863	0.349439	0.12736	0.0418035
Glass-T13	35.8118	198.811	285.093	183.511	81.2699	0.663134	128.318	24.8348	61.5401	1.29545	0.157528	8.00705	2.2004	7.19932	1.11555	5.81539	1.95755	0.929846	3.00657	0.507802	4.07323	0.902278	2.55214	0.412586	2.80777	0.405301	1.41601	0.0855117	0.333787	0.126172	0.0371402
Glass-T14	35.0694	194.365	285.73	180.381	79.266	0.666961	126.357	24.2277	57.164	1.34419	0.169534	7.7793	2.159	7.04374	1.11753	5.79517	2.32806	0.882356	3.46181	0.560378	3.73219	0.840215	2.89326	0.377848	2.69563	0.405002	1.47513	0.0764594	0.294964	0.154573	0.0245687
Glass-T15	36.1548	195.998	285.878	184.859	79.4531	0.638467	128.084	25.1451	57.7617	1.43032	0.31989	8.14014	2.25034	6.94325	1.11923	6.47553	2.33092	0.935094	3.29053	0.536717	3.8135	0.937563	2.80543	0.406531	2.54793	0.422775	1.67697	0.0831943	0.316631	0.112574	0.0359633
Glass-T16	34.881	196.138	285.947	180.406	81.2514	0.641115	124.186	24.6873	60.2192	1.39852	0.247466	7.26778	2.21059	7.178	1.0925	6.4465	2.01931	1.0172	3.00254	0.565453	3.85912	0.869238	2.78965	0.393783	2.39261	0.440277	1.4921	0.103363	0.306033	0.140036	0.0361284
Glass-T17	34.6135	198.024	285.415	184.449	80.6988	0.637699	124.887	24.0958	59.026	1.39225	0.289215	7.85431	2.1885	7.16447	1.11882	6.19137	1.90305	0.866041	3.22615	0.590581	3.68791	0.895203	2.75721	0.380432	2.74342	0.351874	1.48325	0.0803231	0.300433	0.138546	0.029672
Glass-T18	35.8829	197.83	285.905	185.095	80.7557	0.70041	126.733	25.3864	60.9778	1.46659	0.220715	8.43603	2.35969	7.10748	1.11984	5.52145	2.20019	0.978264	3.65182	0.498794	3.95723	0.875164	2.50271	0.402248	2.67237	0.402904	1.25455	0.0902235	0.345782	0.107822	0.0337304
Glass-T19	36.0545	200.692	293.331	192.967	83.2436	0.671267	126.838	24.6464	61.9026	1.37145	0.316977	8.51163	2.37557	7.12176	1.06864	6.25598	2.20949	0.89125	3.1926	0.560985	4.06705	0.913133	2.62813	0.328623	2.38796	0.297431	1.38446	0.0628081	0.356091	0.146136	0.0361754
Glass-T20	35.094	206.63	296.458	185.779	83.1189	0.688165	129.189	23.911	60.7105	1.48276	0.170563	8.16537	2.16028	7.5747	1.08857	6.23777	2.02657	0.899855	2.99509	0.568856	4.09976	0.842242	2.39791	0.328259	2.79568	0.411291	1.38753	0.107271	0.361875	0.145998	0.042372
Glass-T21	35.9077	195.565	284.17	186.069	79.2721	0.774181	127.909	24.8898	60.3159	1.371	0.265515	8.07539	2.34402	7.06897	1.10924	6.0308	2.00052	0.821526	2.7335	0.543082	4.27297	0.742974	2.7634	0.36028	2.37859	0.370212	1.42592	0.0840827	0.359922	0.114784	0.0426452
Glass-T22	34.7117	196.884	278.386	178.507	78.5016	0.667888	125.156	24.2256	57.9685	1.33518	0.211909	7.97917	2.23343	7.01164	1.12203	5.94444	2.03525	0.865252	3.43354	0.50452	3.80293	0.84841	2.48876	0.36723	2.71888	0.379114	1.18965	0.0641351	0.287147	0.1196	0.0424119
Glass-T23	35.6393	192.662	276.175	174.68	77.9492	0.656815	125.939	24.4668	60.387	1.33344	0.154542	8.20138	2.27671	6.9038	1.05882	5.9862	2.10003	0.802092	2.85925	0.558265	3.62014	0.791009	2.96896	0.353308	2.24769	0.404046	1.55704	0.0865103	0.298127	0.119034	0.0441952
Glass-T24	36.0826	198.096	287.161	182.63	79.8267	0.624897	127.994	24.9265	59.392	1.36333	0.269636	8.28037	2.22826	7.20346	1.15665	6.51182	1.96636	0.886488	3.38989	0.597956	4.01547	0.878392	2.60407	0.354449	2.9716	0.40065	1.5454	0.0846089	0.306214	0.119003	0.0274403
Glass-T25	36.2016	197.231	290.73	185.687	80.0275	0.811414	128.038	24.6074	58.9549	1.52462	0.174597	7.41609	2.24479	7.08254	1.10078	6.38488	2.09252	1.01906	3.15846	0.565092	3.92278	0.909061	2.70389	0.362031	2.82706	0.391065	1.60767	0.0916496	0.326992	0.134515	0.0312561
Glass-T26	35.0375	196.769	295.319	184.508	80.4066	0.691812	126.784	24.3109	58.5166	1.44319	0.212417	7.99155	2.28487	7.12304	1.05549	5.63298	2.00619	0.856176	2.94971	0.517033	3.93586	0.838786	2.73948	0.33003	2.17934	0.342755	1.45899	0.0698054	0.290811	0.135649	0.0346377
Glass-T27	35.697	196.655	289.658	184.07	78.433	0.663713	127.165	24.6677	57.4657	1.24688	0.145096	7.42612	2.2226	7.26526	1.19788	6.38275	2.02315	0.972033	3.10731	0.54677	4.17739	0.885117	2.38244	0.377503	2.85913	0.381865	1.31235	0.0700539	0.329836	0.116442	0.0461238
Glass-T28	35.334	196.797	300.142	183.526	77.3938	0.778802	125.758	23.9905	58.8763	1.27163	0.325713	8.01361	2.32392	7.26981	1.11878	6.04115	2.28502	0.909583	3.23491	0.500082	4.17182	0.895497	2.57223	0.422946	2.73857	0.406011	1.30856	0.0867569	0.307459	0.132415	0.0416298
Glass-T29	35.8317	199.867	295.53	185.066	80.0438	0.82031	126.079	23.9191	58.2513	1.40931	0.204215	7.66255	2.17813	7.22969	1.15414	5.83577	2.20723	0.948746	3.15779	0.517681	3.91257	0.904155	2.7133	0.360511	2.64653	0.411429	1.49018	0.094032	0.332275	0.154459	0.0290145
Glass-T30	35.6435	197.787	299.677	186.914	80.1627	0.693962	128.578	24.0449	58.9712	1.44222	0.290258	7.87194	2.28279	7.26494	1.10207	6.27858	2.37407	0.9712	3.08467	0.527781	4.20616	0.858281	2.63652	0.424233	2.77794	0.382447	1.46275	0.0821864	0.308203	0.139399	0.0350313
Glass-T31	35.3599	194.602	288.643	182.803	78.3338	0.753747	125.028	24.9065	59.6746	1.42537	0.269374	8.24464	2.25122	7.36775	1.12126	5.63496	2.37032	0.910333	3.25775	0.472454	3.73916	0.817049	2.62166	0.409695	2.68421	0.421322	1.54539	0.08998	0.337276	0.112565	0.0481138
Glass-T32	35.5409	196.466	289.186	179.012	79.2966	0.751475	126.595	24.6746	57.4073	1.34074	0.233672	7.74375	2.23219	7.22603	1.06081	6.0271	2.12258	0.878039	3.07575	0.557056	3.90133	0.834999	2.61283	0.361467	2.40026	0.384314	1.2668	0.0773241	0.330575	0.140266	0.0515693
Glass-T33	35.671	197.597	289.252	176.399	80.0223	0.664573	125.338	24.0538	57.1602	1.41438	0.2814	8.29617	2.35734	7.1591	1.10535	6.1143	2.4072	0.961664	3.02478	0.635579	3.73748	0.778353	2.40476	0.368388	2.52128	0.333155	1.39934	0.0913504	0.279698	0.137957	0.0342827
Glass-T34	35.2718	193.051	288.902	179.164	77.449	0.738868	125.239	23.8747	59.3712	1.43785	0.157641	7.98541	2.32466	6.97288	1.17208	6.08823	1.87501	0.916471	2.88644	0.555486	3.90542	0.845375	2.72957	0.376594	2.72576	0.360411	1.43058	0.0576807	0.334482	0.165099	0.0440803

## Sheet: Table S6
Table S6. The trace elements (ppm) of melt inclusions hosted by olivine
Sample name	Sc	V	Cr	Ni	Zn	Rb	Sr	Y	Zr	Nb	Mo	Ba	La	Ce	Pr	Nd	Sm	Eu	Gd	Tb	Dy	Ho	Er	Tm	Yb	Lu	Hf	Ta	Pb	Th	U
M-057	58.1515	187.211	1193.67	8283.34	332.264	0.832126	114.82	39.3853	85.7297	1.1513	0.678727	7.76027	2.09579	7.09384	1.41877	6.97145	3.26957	0.763518	3.50083	0.821938	7.36108	1.82595	4.51759	0.409212	3.03116	0.538357	3.17293	0.123364	0.232866	0.134337	0.0637115
M-148	36.0645	143.222	318.954	115.958	73.8646	0.308141	76.5844	23.1808	29.1289	0.568393	-	4.86578	1.42216	4.83429	0.752231	4.9604	1.81338	0.761059	2.87814	0.507222	3.45236	0.746107	2.77678	0.37923	2.31311	0.416574	0.784244	0.0239175	0.138141	0.102927	0.0199014
M-008	34.956	192.385	293.024	175.413	78.6277	0.632099	127.774	24.925	58.9709	1.38691	0.393845	8.80789	2.22357	6.97195	0.997675	6.42959	1.73287	0.941322	2.62048	0.550153	3.84781	0.759662	2.71982	0.370736	2.44451	0.397855	1.33222	0.0639225	0.367896	0.127359	0.0376364
M-011	35.032	198.152	290.3	153.207	77.9079	0.839967	126.28	23.7919	58.1752	1.40983	0.116344	8.15006	2.07507	7.11072	1.12517	6.68112	1.89796	0.844623	2.9693	0.500264	3.95465	0.934631	2.72974	0.408329	2.43043	0.389719	1.76572	0.0419413	0.345704	0.132735	0.0281325
M-013	36.5765	204.987	286.608	132.924	82.9864	0.664414	131.435	26.3502	60.9056	1.54175	0.20103	9.22001	2.38993	7.26655	1.17684	6.62267	2.03207	0.963466	3.30644	0.547631	3.92473	0.965558	2.74857	0.371888	2.47116	0.456505	1.74805	0.0864237	0.302472	0.135809	0.040397
M-046	38.635	220.716	364.517	176.698	83.655	0.46352	142.42	28.5427	65.7488	1.35183	0.36287	8.59276	2.44042	7.97712	1.16382	6.8044	2.53119	1.00562	4.12377	0.693437	4.69283	0.982588	3.11304	0.448176	2.61248	0.451649	1.82523	0.0503192	0.293262	0.187225	0.0483674
M-047	37.6716	218.819	362.837	271.579	84.6602	0.980576	140.48	25.6679	65.934	1.42926	0.308011	8.81373	2.46833	7.71371	1.21419	7.45828	2.4059	1.04839	3.16351	0.552407	3.9127	0.955276	3.23027	0.439615	2.89429	0.408247	1.4741	0.0868775	0.284525	0.137395	0.0385511
M-049	35.3662	200.835	352.97	84.9764	78.9008	0.671452	131.046	25.8376	61.0432	1.22807	0.220406	7.44684	2.37261	7.10197	1.2003	7.54984	2.21838	0.958281	3.49291	0.514398	4.28095	0.91931	2.9815	0.420354	2.68618	0.374199	1.57755	0.0724653	0.444636	0.126544	0.0336268
M-062	35.0132	192.474	334.431	174.865	76.1097	0.861013	127.379	25.1092	60.4109	1.67694	0.177804	8.88837	2.50474	7.17112	1.20937	6.67754	2.58973	0.878586	3.13442	0.558691	4.01394	0.816094	2.65806	0.364862	2.80747	0.368492	1.64633	0.0926412	0.31356	0.148373	0.0309502
M-071	36.5476	197.49	403.786	205.316	82.4329	0.736896	132.049	26.5495	62.2601	1.4043	0.260387	8.69306	2.36557	7.31618	1.15106	5.57249	2.29213	0.954628	3.71591	0.533974	4.04308	0.899064	2.4337	0.506433	2.57044	0.30591	1.23124	0.0935971	0.331471	0.11816	0.0326439
M-099	-	-	-	-	-	0.760877	129.369	24.5534	57.6742	1.33816	0.180546	8.63211	2.12863	6.94654	1.09238	6.78282	2.00457	0.868822	3.42175	0.566416	3.30509	0.93063	2.70998	0.345327	3.02528	0.357319	1.36499	0.0726165	0.374772	0.0992077	0.0325226
M-105	37.1587	201.618	338.959	120.288	80.5288	0.677595	131.689	25.6299	61.4729	1.42909	0.197522	7.40672	2.427	7.42689	1.198	6.51527	2.21827	0.989718	3.38995	0.625857	4.12309	0.92001	3.17023	0.379232	2.65916	0.444995	1.49475	0.106824	0.333583	0.122457	0.0345859
M-108	36.4674	203.908	309.491	213.701	82.8511	0.971184	129.66	25.4416	62.5771	1.46155	0.33989	8.34467	2.35269	7.50932	1.20037	6.41312	2.41107	0.895119	3.35686	0.640821	4.40437	0.975494	3.16247	0.406532	3.10573	0.429503	1.51262	0.0742062	0.448676	0.13747	0.0413281
M-109	37.8337	205.38	306.559	67.6184	84.3839	0.589226	130.981	26.9939	61.6256	1.33691	0.181945	7.99249	2.40995	7.58382	1.20322	6.03799	1.79542	0.906544	3.79219	0.465151	4.58329	0.976701	2.78115	0.381141	2.23543	0.37902	1.56061	0.080634	0.312382	0.143492	0.0311028
M-117	35.3117	195.192	345.367	108.016	78.9213	0.650962	126.212	24.1691	57.2926	1.36633	0.237507	7.21759	2.34276	7.00874	1.10276	5.78632	2.22515	0.964938	2.85291	0.533709	4.0956	0.788948	2.63027	0.348326	2.56551	0.481913	1.54481	0.0959266	0.339527	0.137426	0.0369535
M-127	35.1896	201.42	291.073	123.7	80.7101	0.759789	126.049	25.6784	57.3776	1.17033	0.0777244	7.335	2.44143	7.00277	1.00085	6.79874	2.06565	0.865406	3.02572	0.655503	3.51427	0.906707	2.80807	0.366671	2.39719	0.406607	1.57592	0.088521	0.325706	0.123157	0.0242848
M-151	37.1734	204.918	299.166	119.437	82.082	0.543685	132.748	25.7415	63.1105	1.23914	0.314504	8.35398	2.3832	7.71362	1.19508	6.64178	2.18436	1.00755	3.4772	0.571349	4.25938	0.892915	2.89331	0.422684	3.67785	0.441071	1.94545	0.115437	0.312574	0.177818	0.0297526
M-158	34.9506	191.125	296.667	138.57	78.3016	0.716608	125.747	24.3709	58.8408	1.42634	0.15683	7.85142	2.23185	6.96803	1.1494	6.25307	2.16285	0.891002	3.25795	0.531694	3.95279	0.849446	2.65985	0.382545	2.77815	0.389659	1.29222	0.0816447	0.335849	0.145755	0.0332415
M-159	37.1871	209.946	363.332	280.341	80.894	0.673856	133.747	25.1126	63.3191	1.40708	0.232685	7.41117	2.44505	7.48193	1.23199	6.37097	2.26675	0.940941	3.34714	0.620932	3.96196	0.907085	2.87478	0.334684	2.74192	0.441057	1.31993	0.063928	0.296817	0.127707	0.0372472
M-162	36.1705	201.722	369.964	96.1494	81.3996	0.730279	129.809	24.6043	58.6601	1.41695	0.273221	7.07445	2.10756	7.2174	1.24012	6.11238	2.38746	0.964334	3.30592	0.574896	4.47171	0.941418	2.98757	0.337391	2.55775	0.333342	1.24423	0.096528	0.292738	0.119552	0.0396078
M-180	36.7149	205.94	360.666	131.653	77.2994	0.703399	128.767	25.2565	59.9326	1.36845	0.198245	7.71194	2.30934	7.22213	1.18583	6.44747	2.3553	0.934323	3.25692	0.611818	3.9637	0.851854	2.8997	0.404343	2.51154	0.402883	1.68431	0.0725418	0.302365	0.12003	0.0304509
M-183	37.2514	207.179	321.166	67.7671	84.7995	0.703886	133.456	25.2393	61.0359	1.37409	0.21107	7.84237	2.38977	7.55235	1.19509	6.43024	2.34799	1.07787	3.56968	0.571503	4.16787	0.959407	2.87056	0.3422	2.72114	0.388341	1.3121	0.0892701	0.306872	0.163667	0.046944
M-186	-	-	-	-	-	0.716591	133.291	26.672	62.903	1.42624	0.329278	7.94148	2.43432	7.71058	1.26371	7.04751	2.36835	1.06139	3.1358	0.591017	4.1707	0.911585	3.41245	0.416977	2.75293	0.394798	1.5111	0.087177	0.292849	0.127708	0.0371601
M-190	-	-	-	-	-	0.818823	141.628	25.3171	64.123	1.42761	0.202504	9.24518	2.42138	7.72807	1.16802	6.26215	2.02499	1.07537	2.96129	0.57976	3.436	0.947775	2.5036	0.410981	2.70609	0.314443	1.22202	0.0910418	0.333507	0.143439	0.0283153
